# Supplementary material for: Mining for Oxysterols in Cyp7b1−/− Mouse Brain and Plasma: Relevance to Spastic Paraplegia Type 5
Source: MDPI journal article supplement (doi:10.3390/biom9040149), 2019-04-13

Figure S1

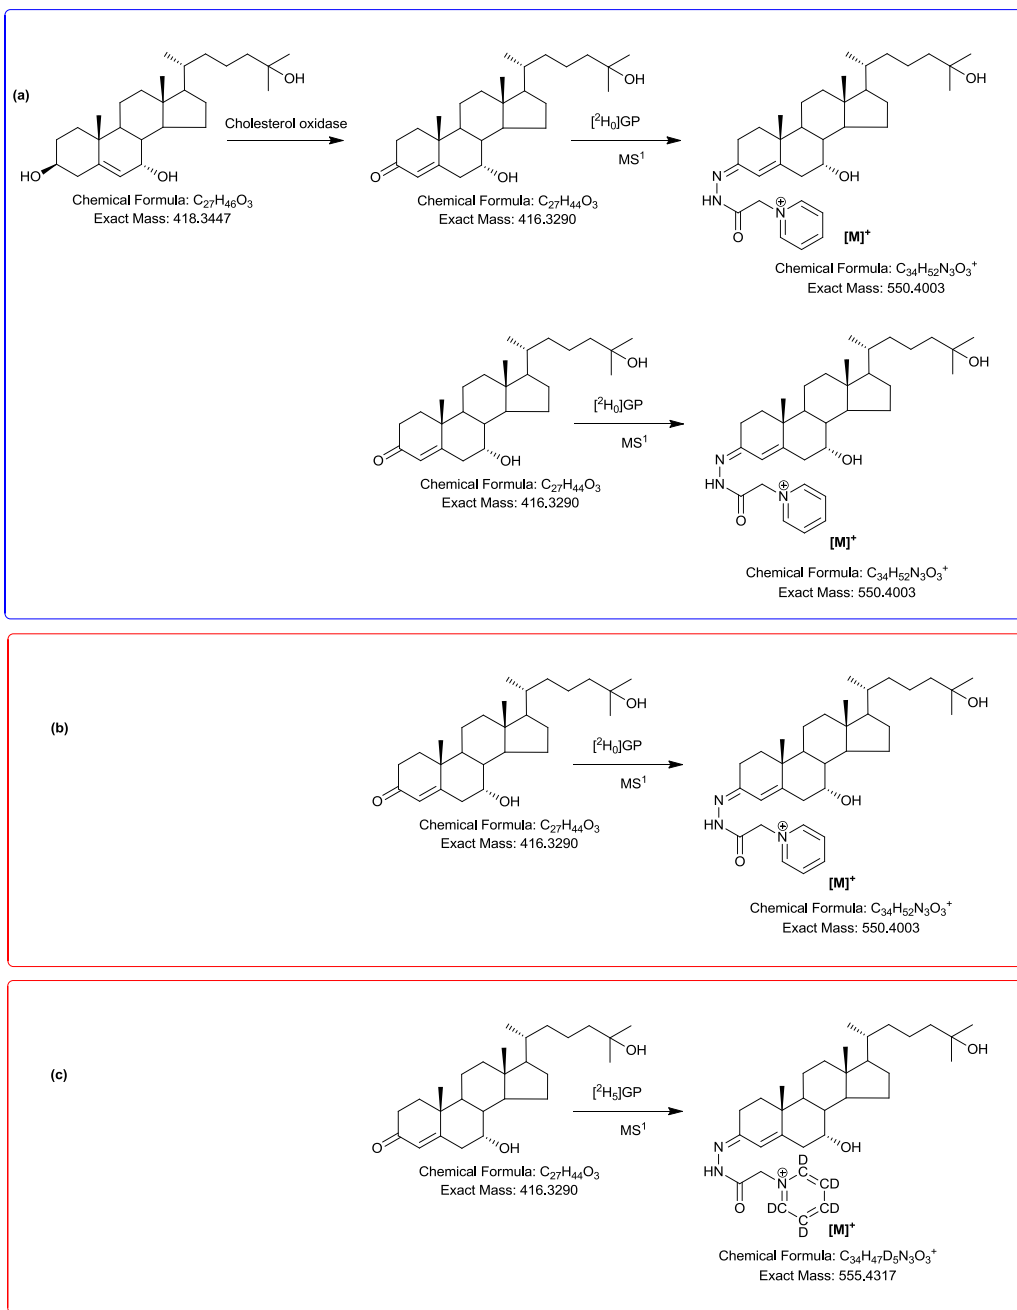

Figure S2

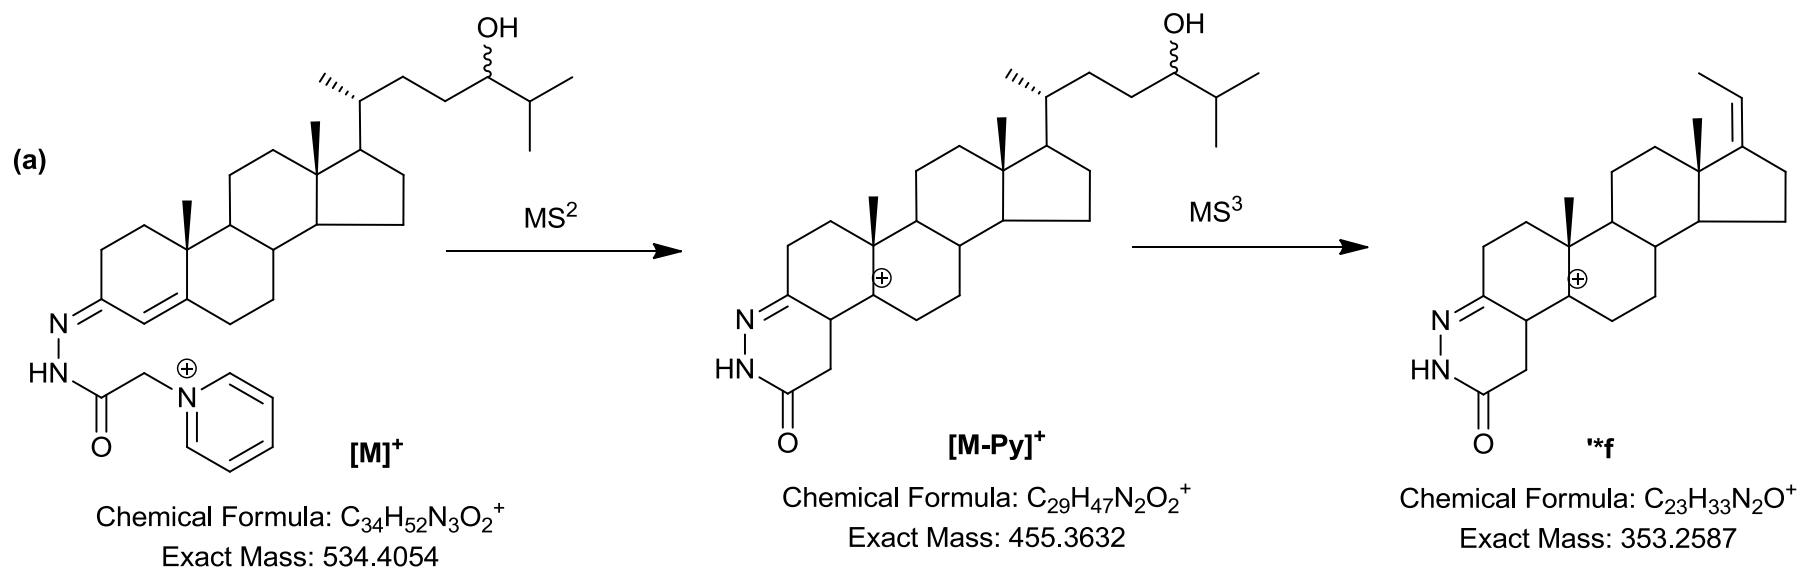

Figure S3

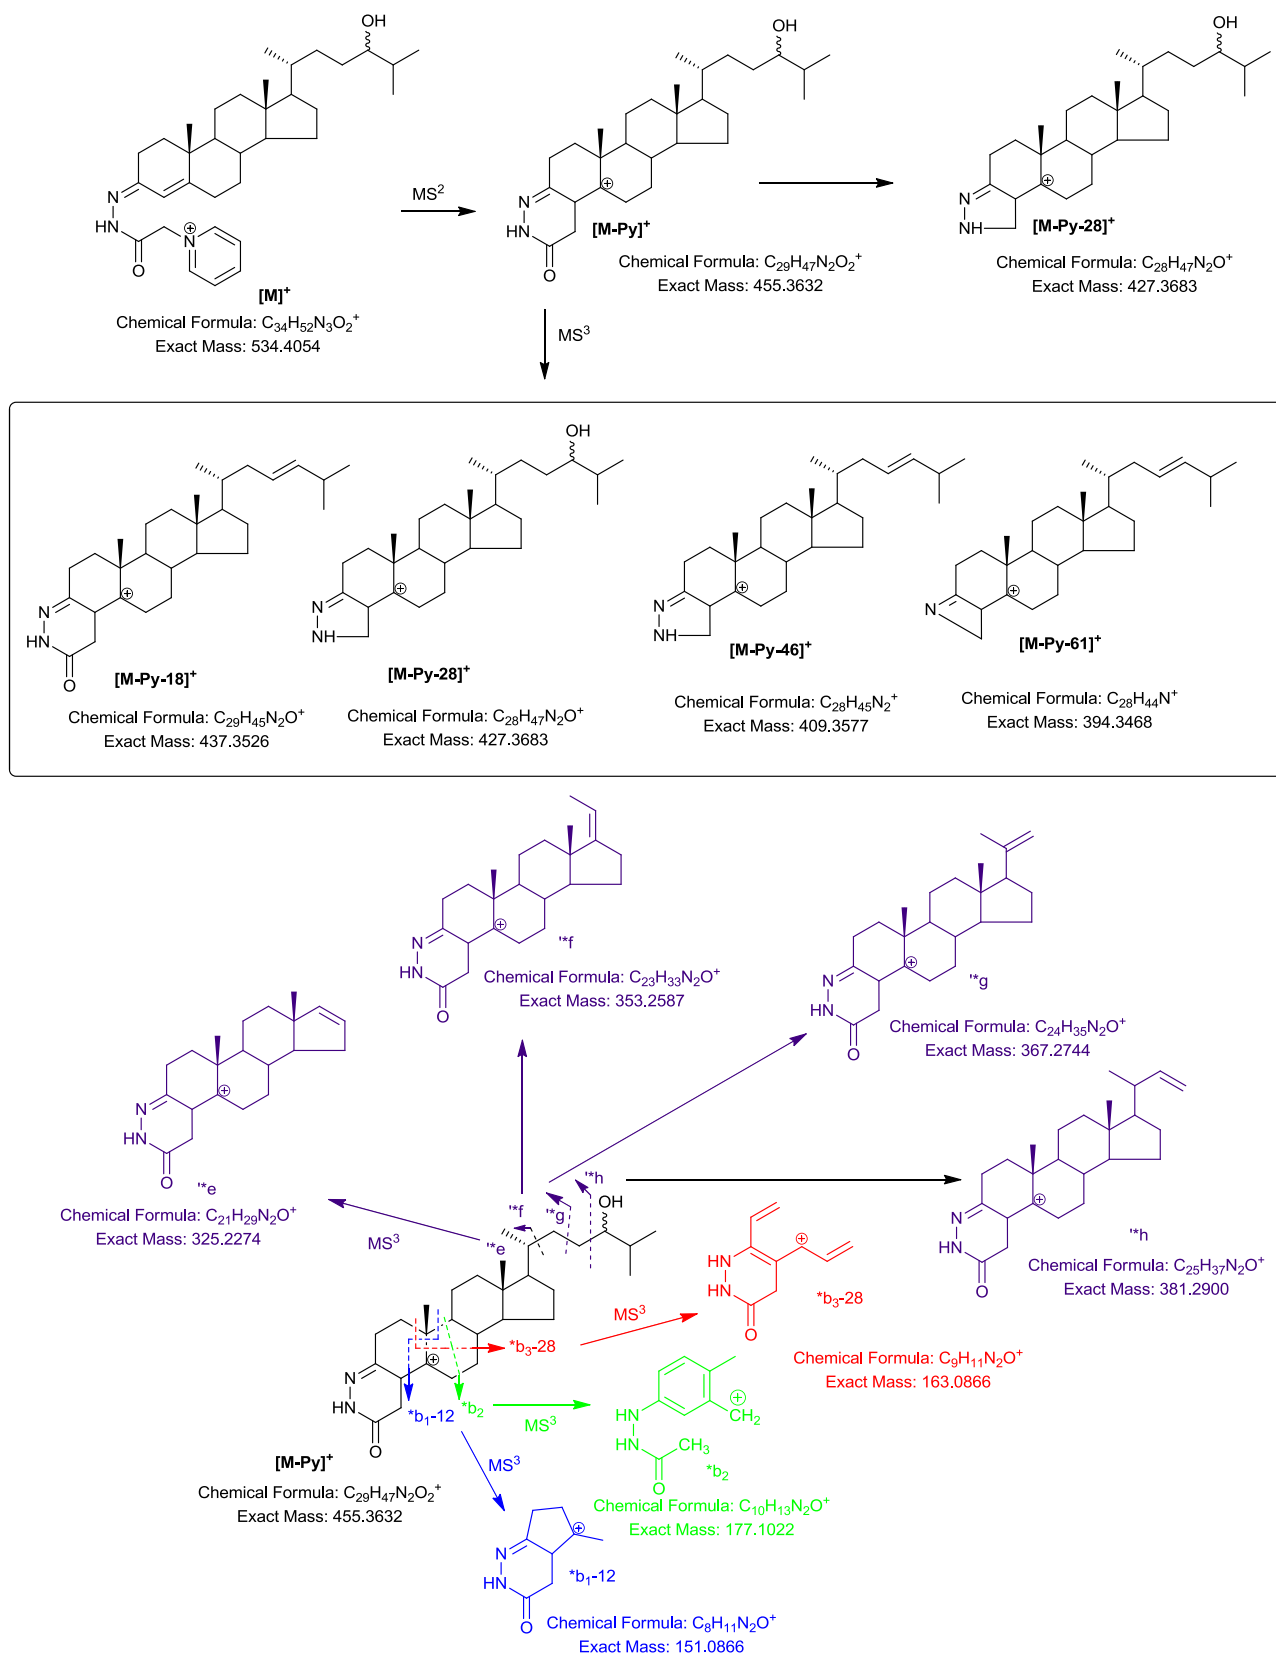

Figure S4

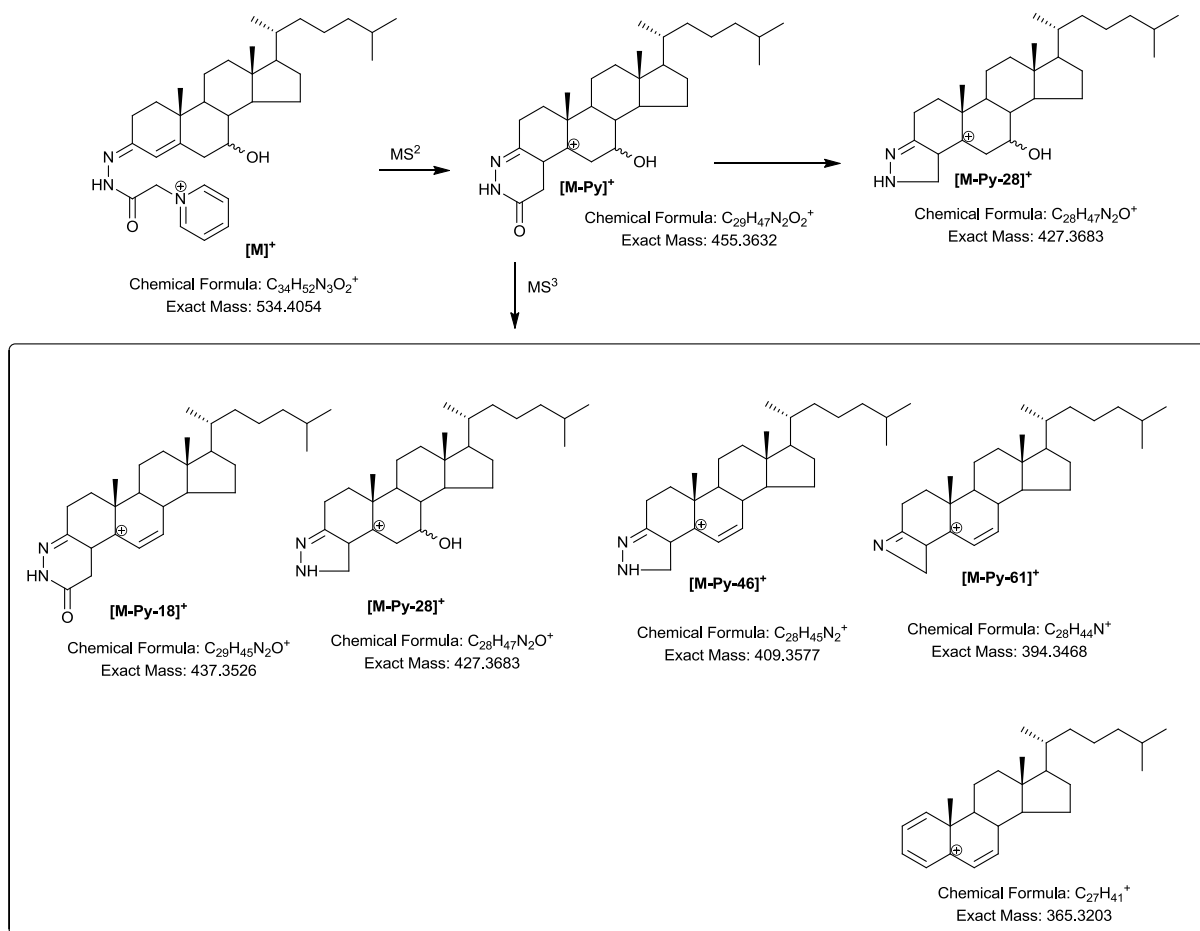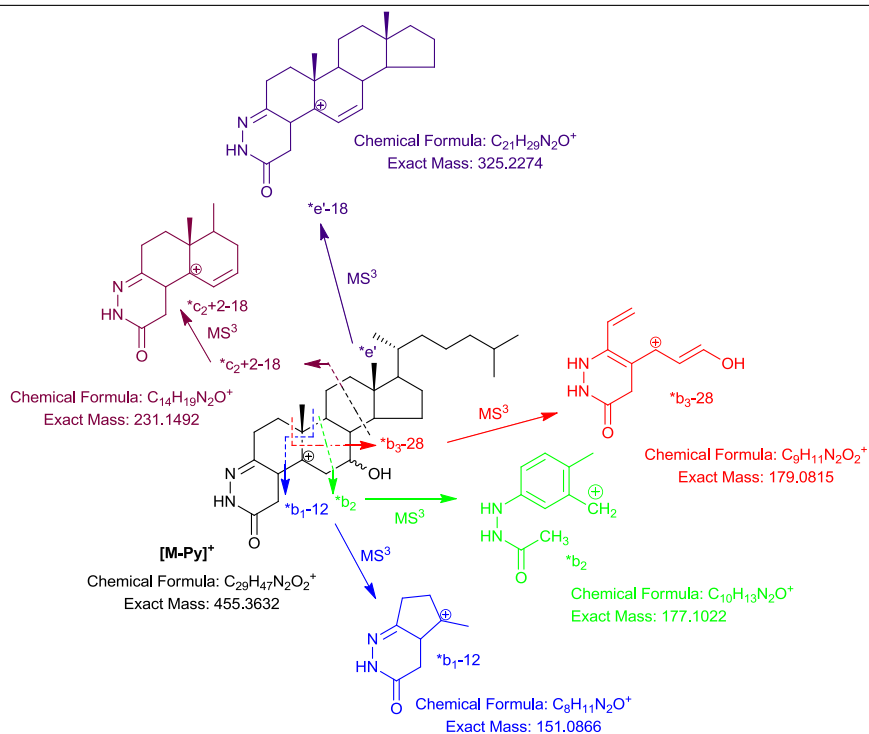

RT: 0.00 - 17.01

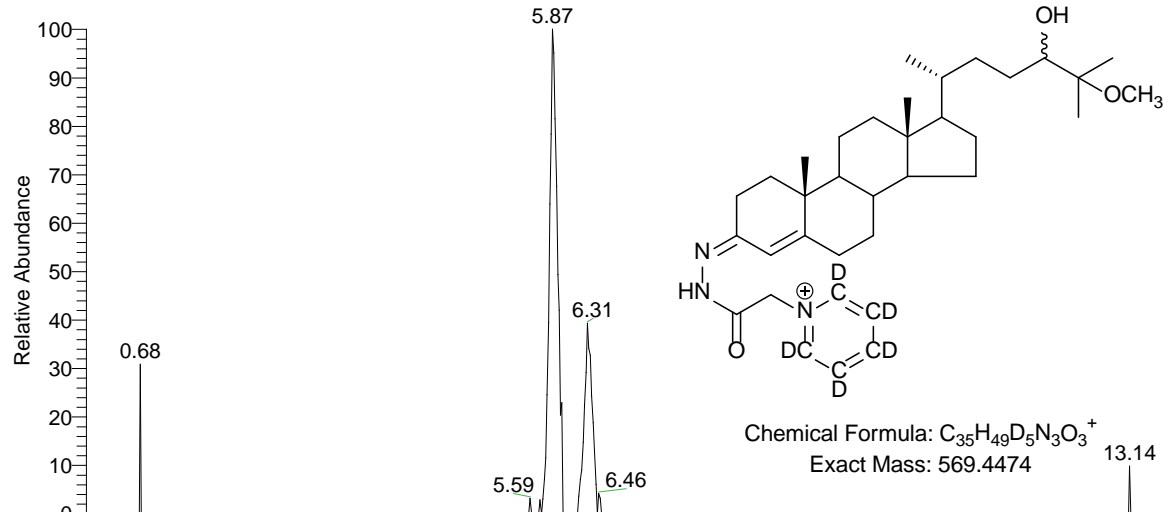

NL: 2.39E3  
m/z= 569.4446-569.4502 F:  
FTMS + p ESI Full ms  
[400.00-610.00] MS  
pc\_m\_plasma\_ko\_1167\_fr1a\_gpd5\_fr1b\_gpd0\_120809\_07

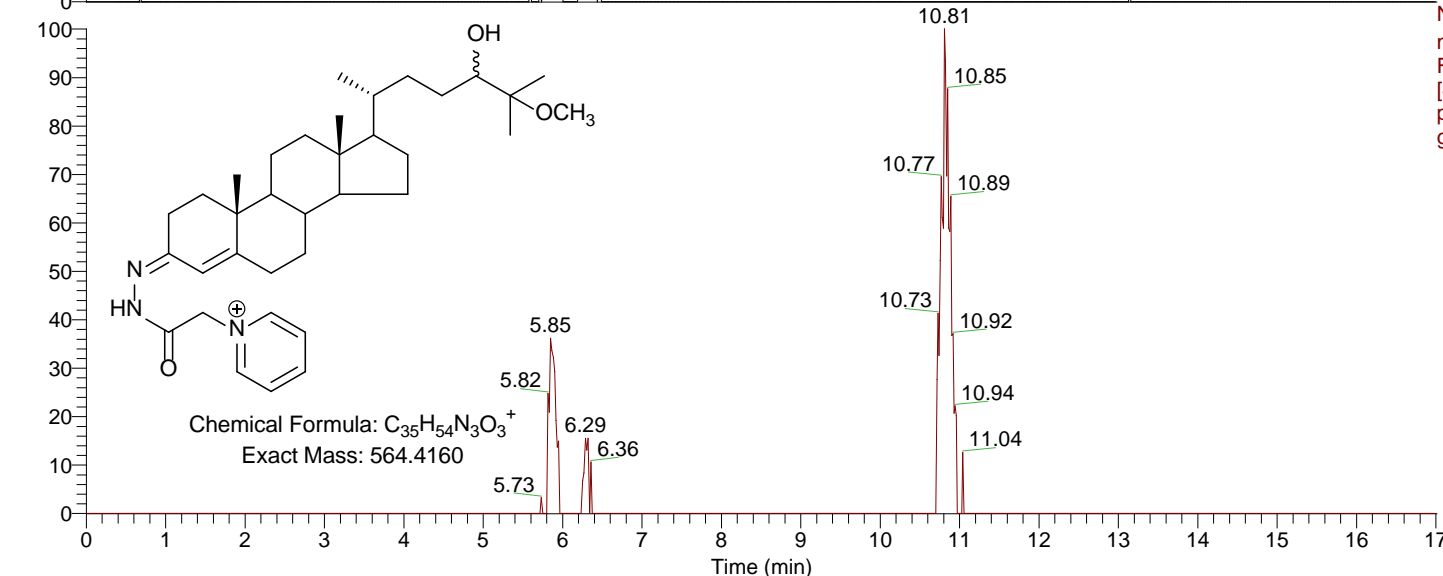

NL: 1.51E3  
m/z= 564.4132-564.4188 F:  
FTMS + p ESI Full ms  
[400.00-610.00] MS  
pc\_m\_plasma\_wt\_1178\_fr1a\_gpd0\_fr1b\_gpd5\_120809\_07

RT: 0.00 - 17.01

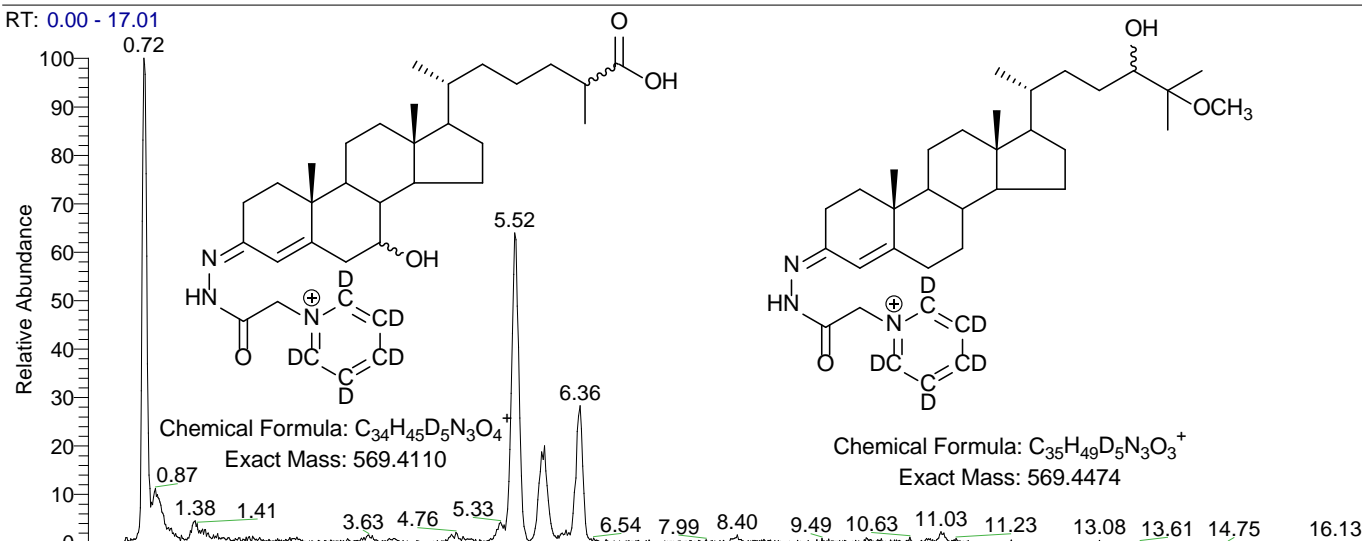

NL: 1.03E4

TIC F: ITMS + c ESI Full ms3

569.41@cid30.00

485.34@cid35.00 [130.00-575.00]

MS

pc\_m\_plasma\_ko\_1167\_fr1a\_gpd

5\_fr1b\_gpd0\_120809\_07

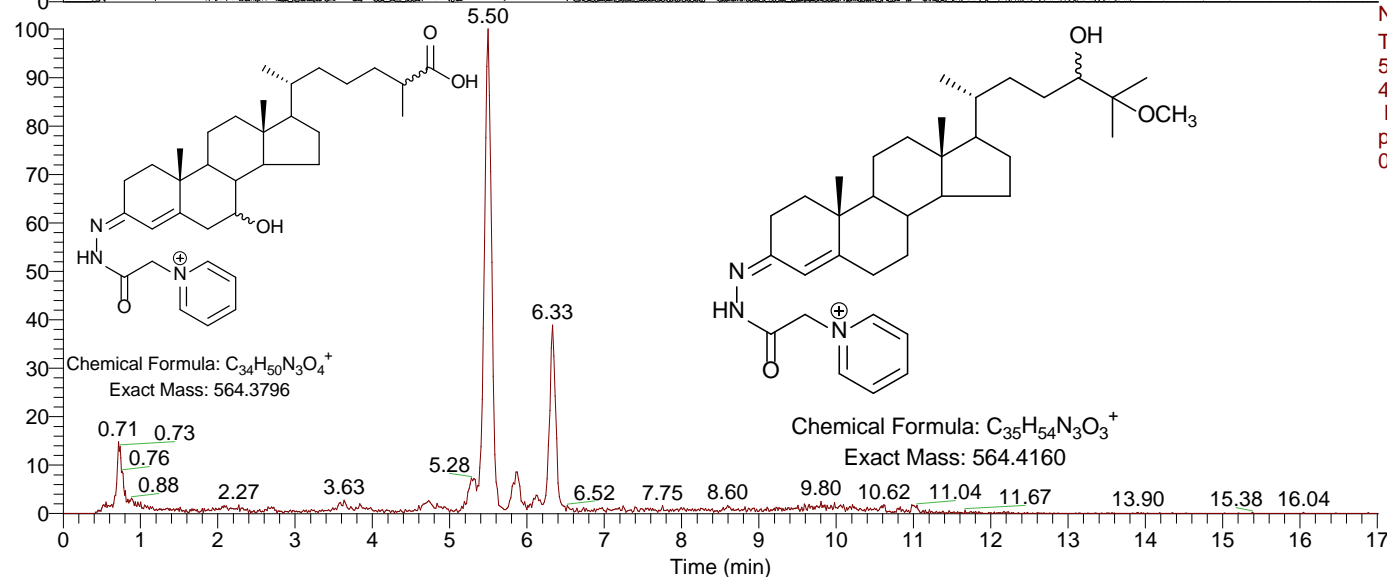

NL: 9.92E3

TIC F: ITMS + c ESI Full ms3

564.38@cid30.00

485.34@cid35.00 [130.00-575.00]

MS

pc\_m\_plasma\_wt\_1178\_fr1a\_gpd

0\_fr1b\_gpd5\_120809\_07

# S5c

pc\_m\_plasma\_ko\_1167\_fr1a\_gpd5\_fr1b\_gp...

10/08/2012 03:59:44

pc\_m\_plasma\_ko\_1167\_fr1a\_gpd5\_fr1b\_gpd0\_120809\_07 #1158 RT: 5.87 AV: 1 NL: 1.30E3

F: ITMS + c ESI Full ms3 569.41 @cid30.00 485.34 @cid35.00 [130.00-575.00]

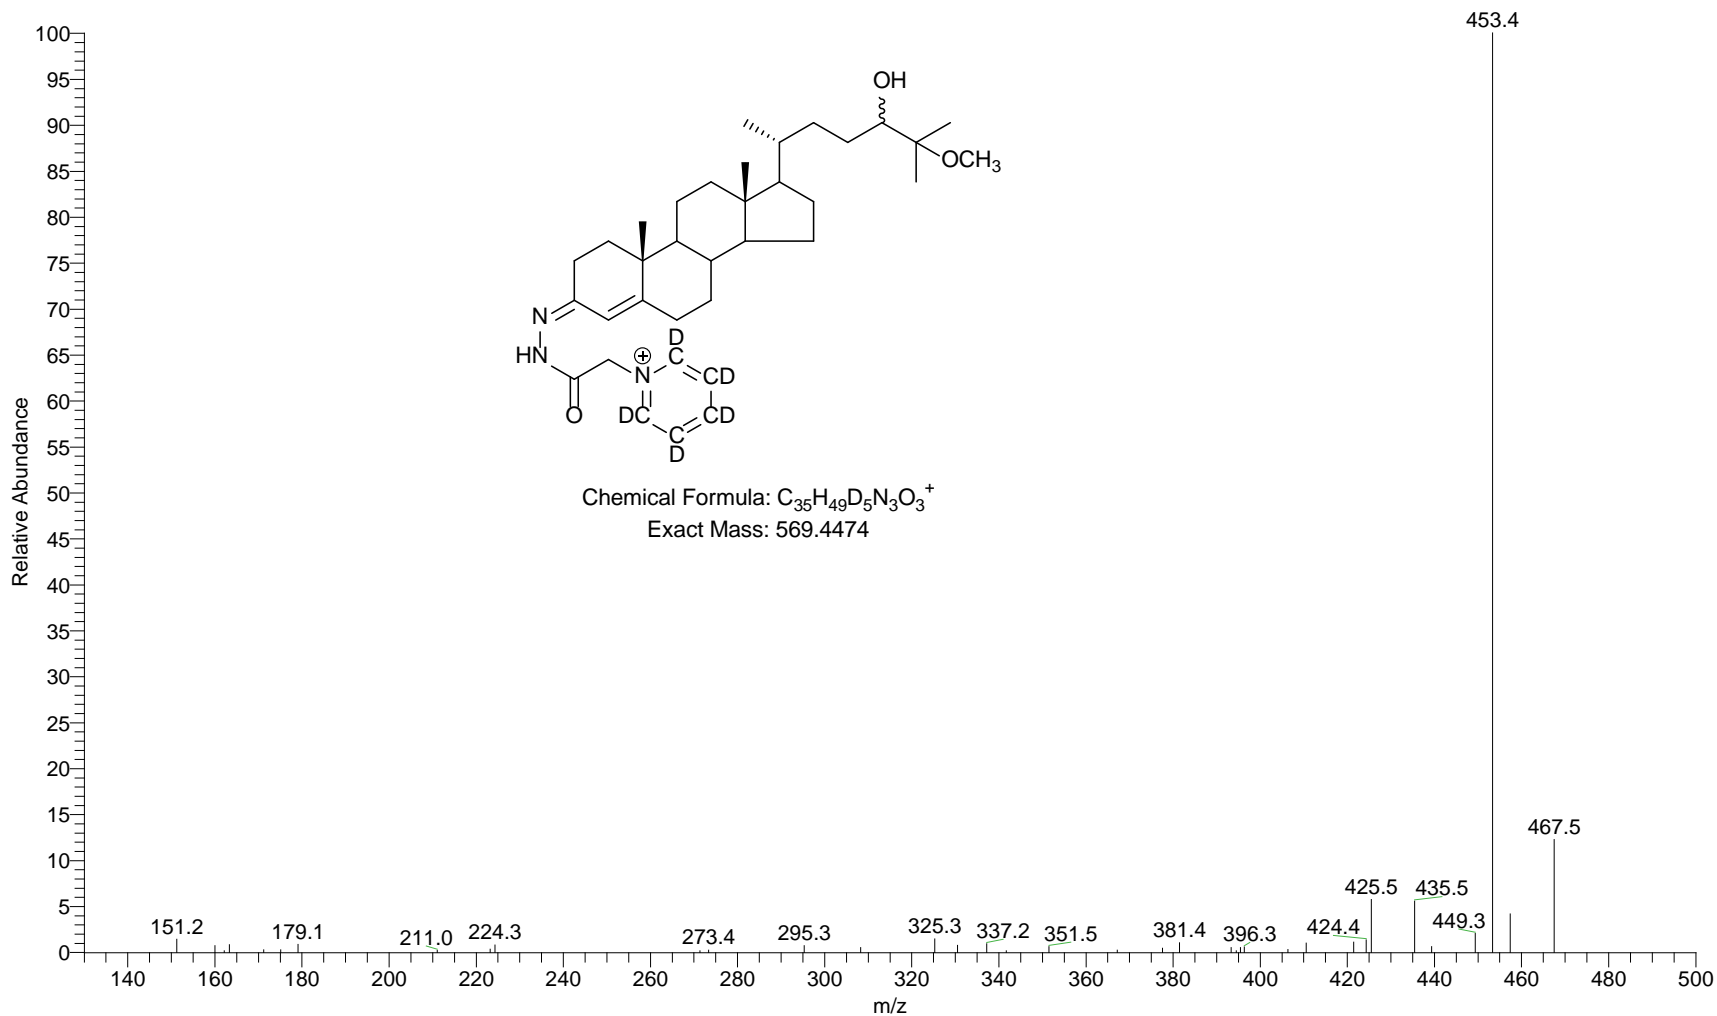

RT: 0.00 - 17.01

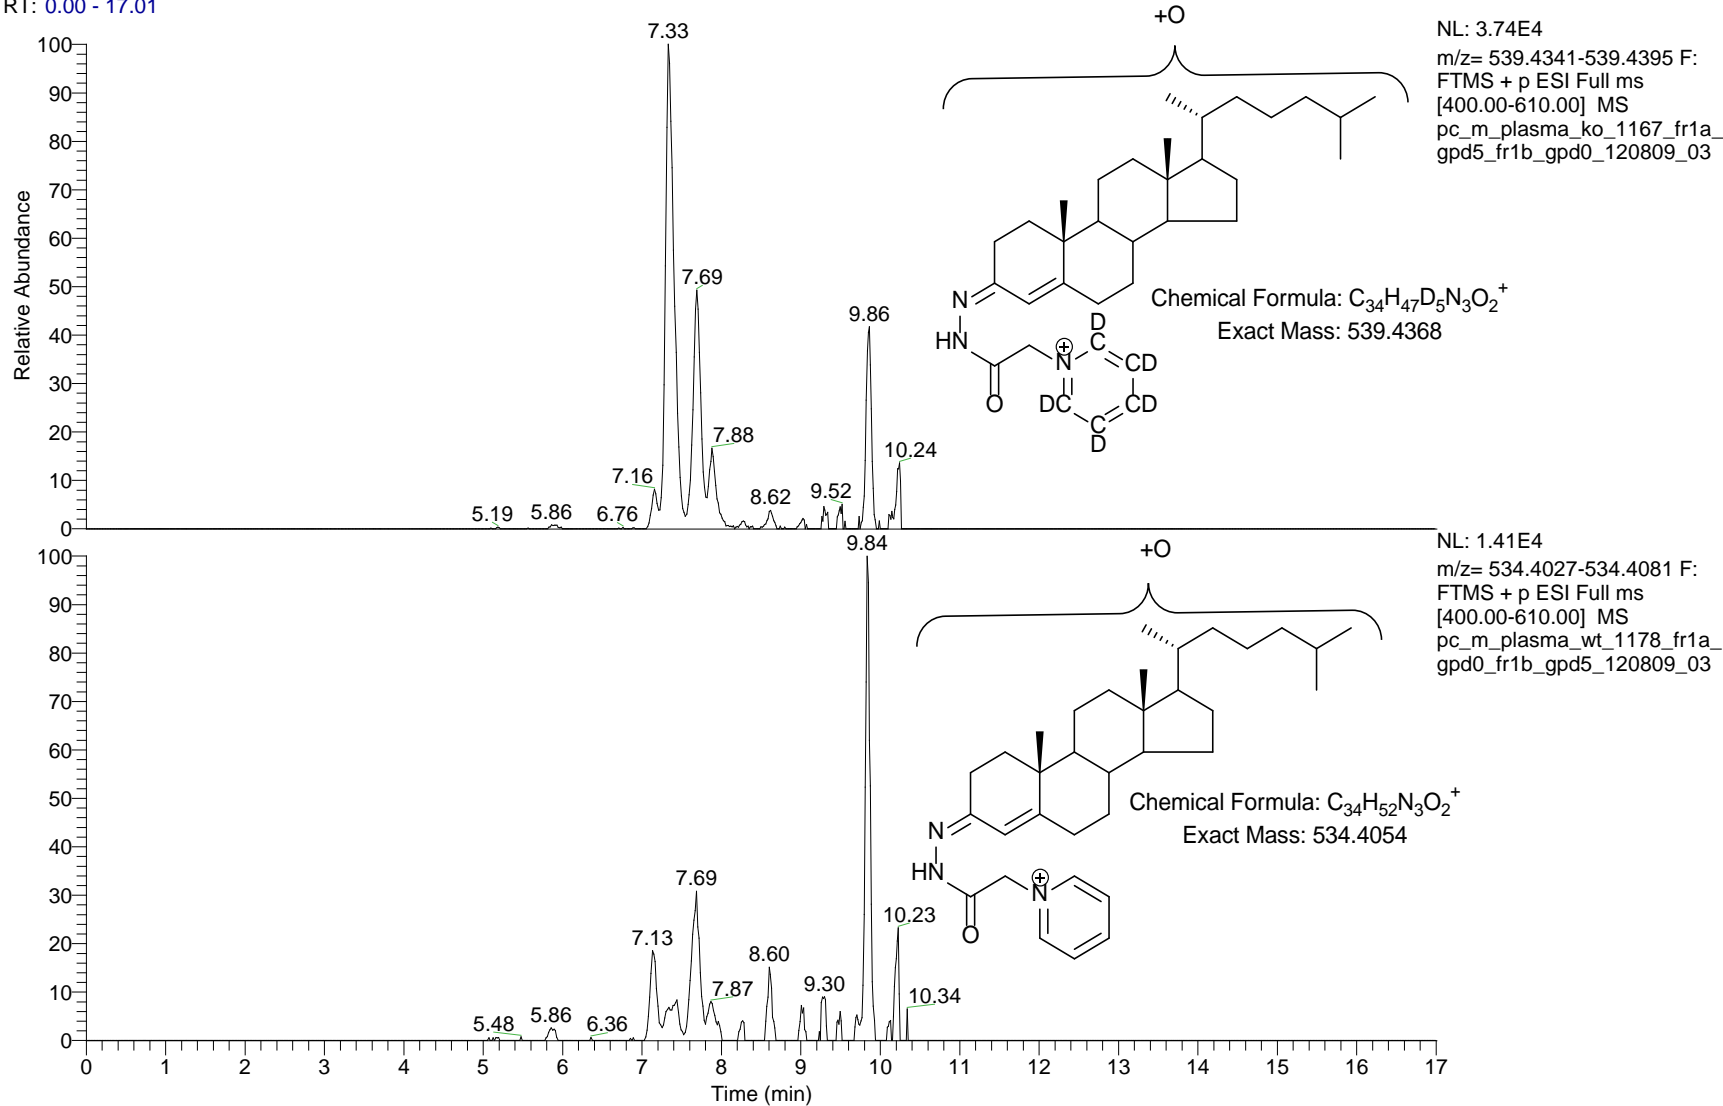



RT: 0.00 - 17.01

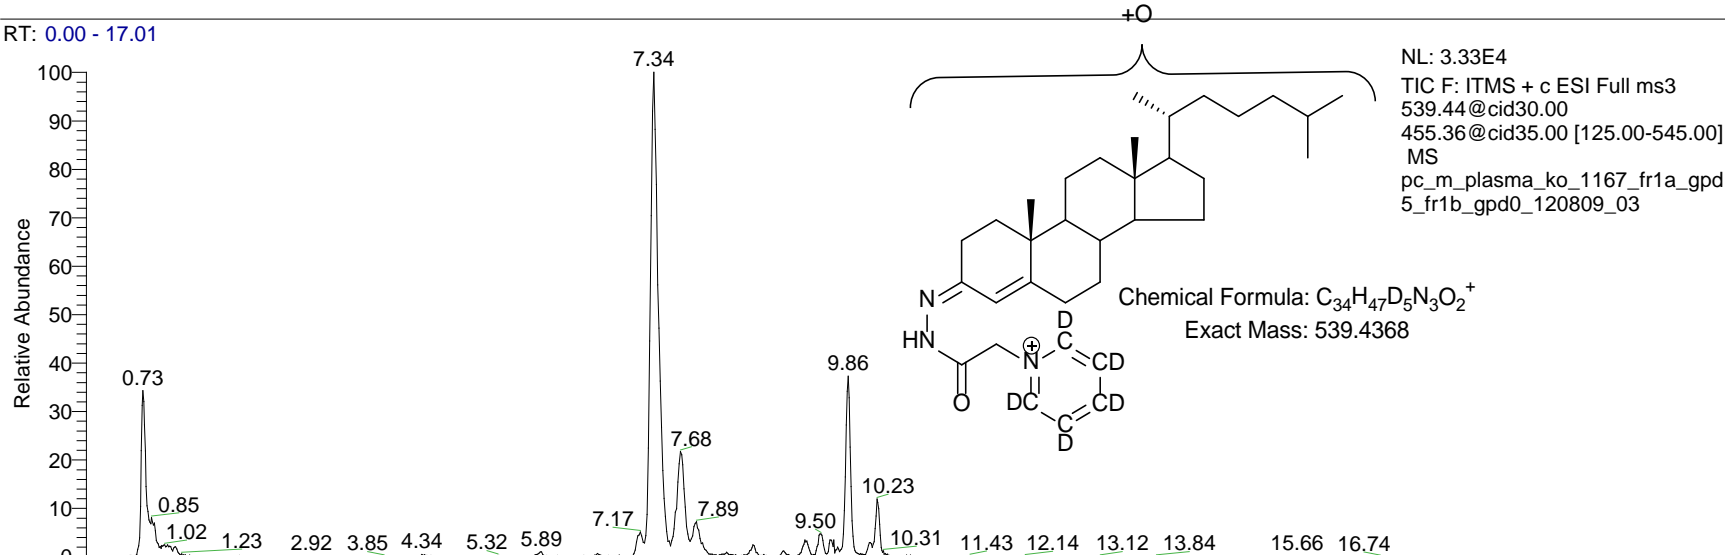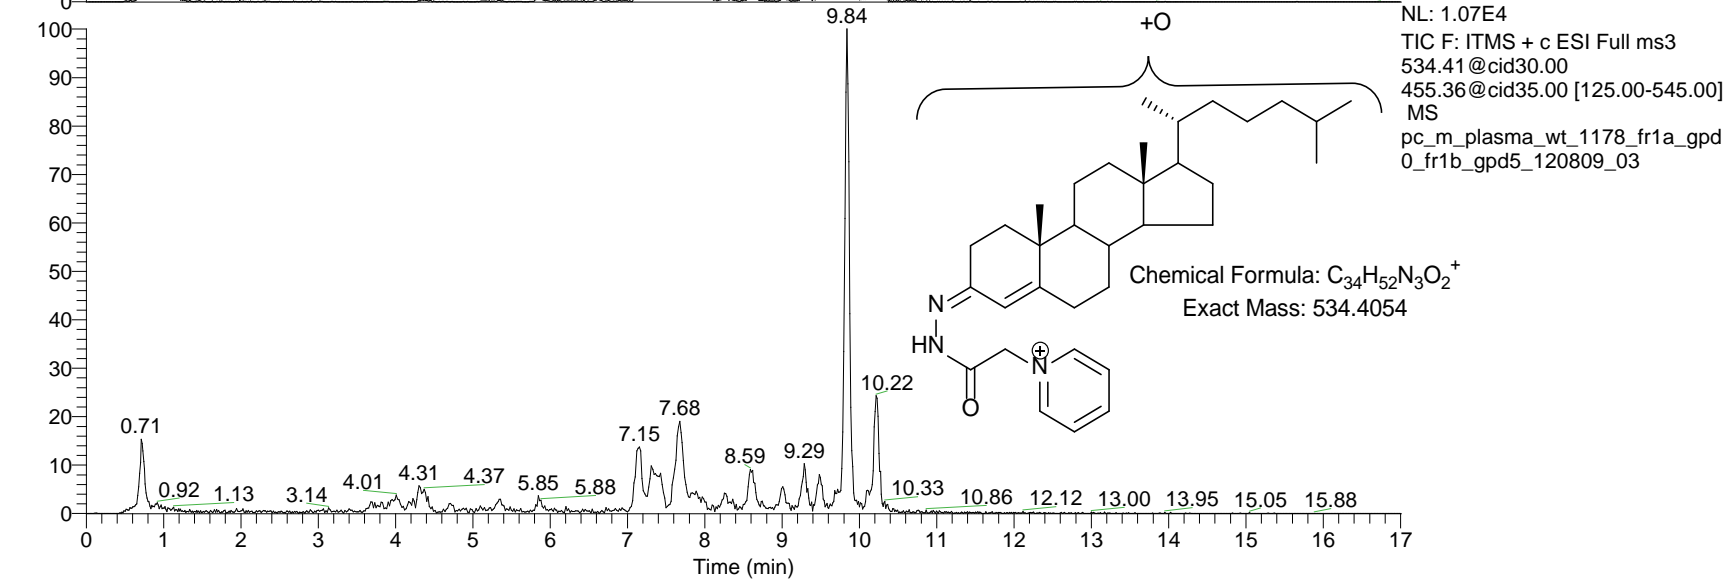

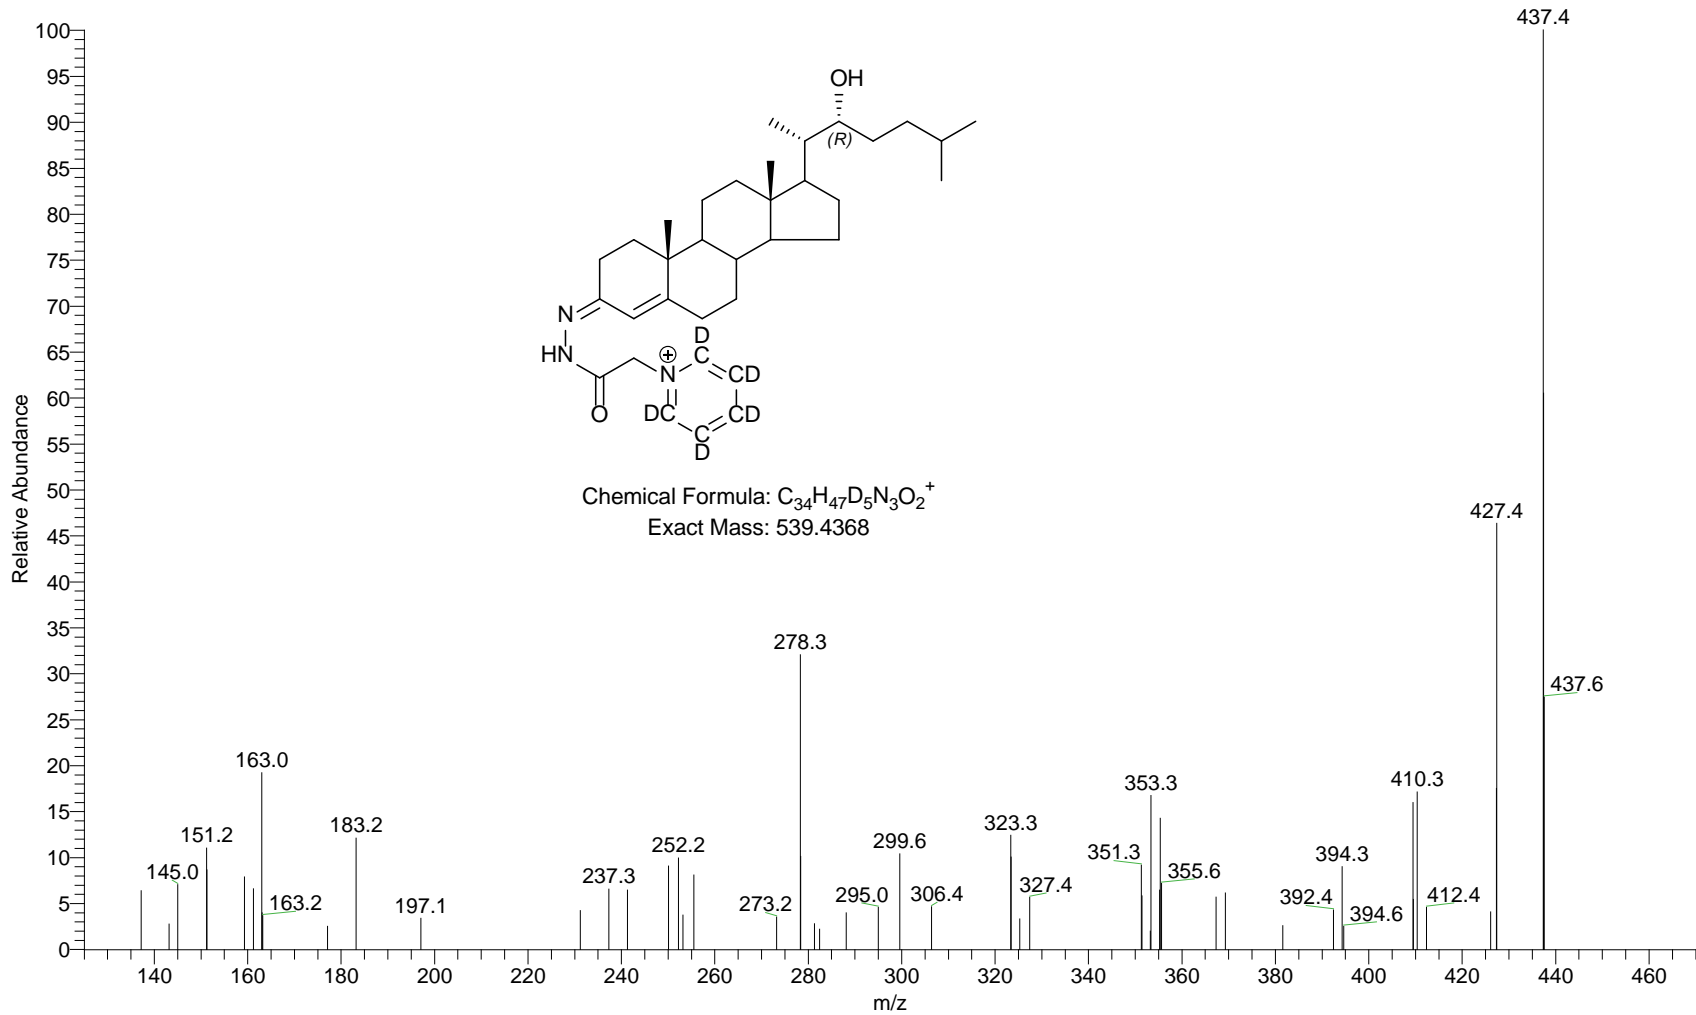

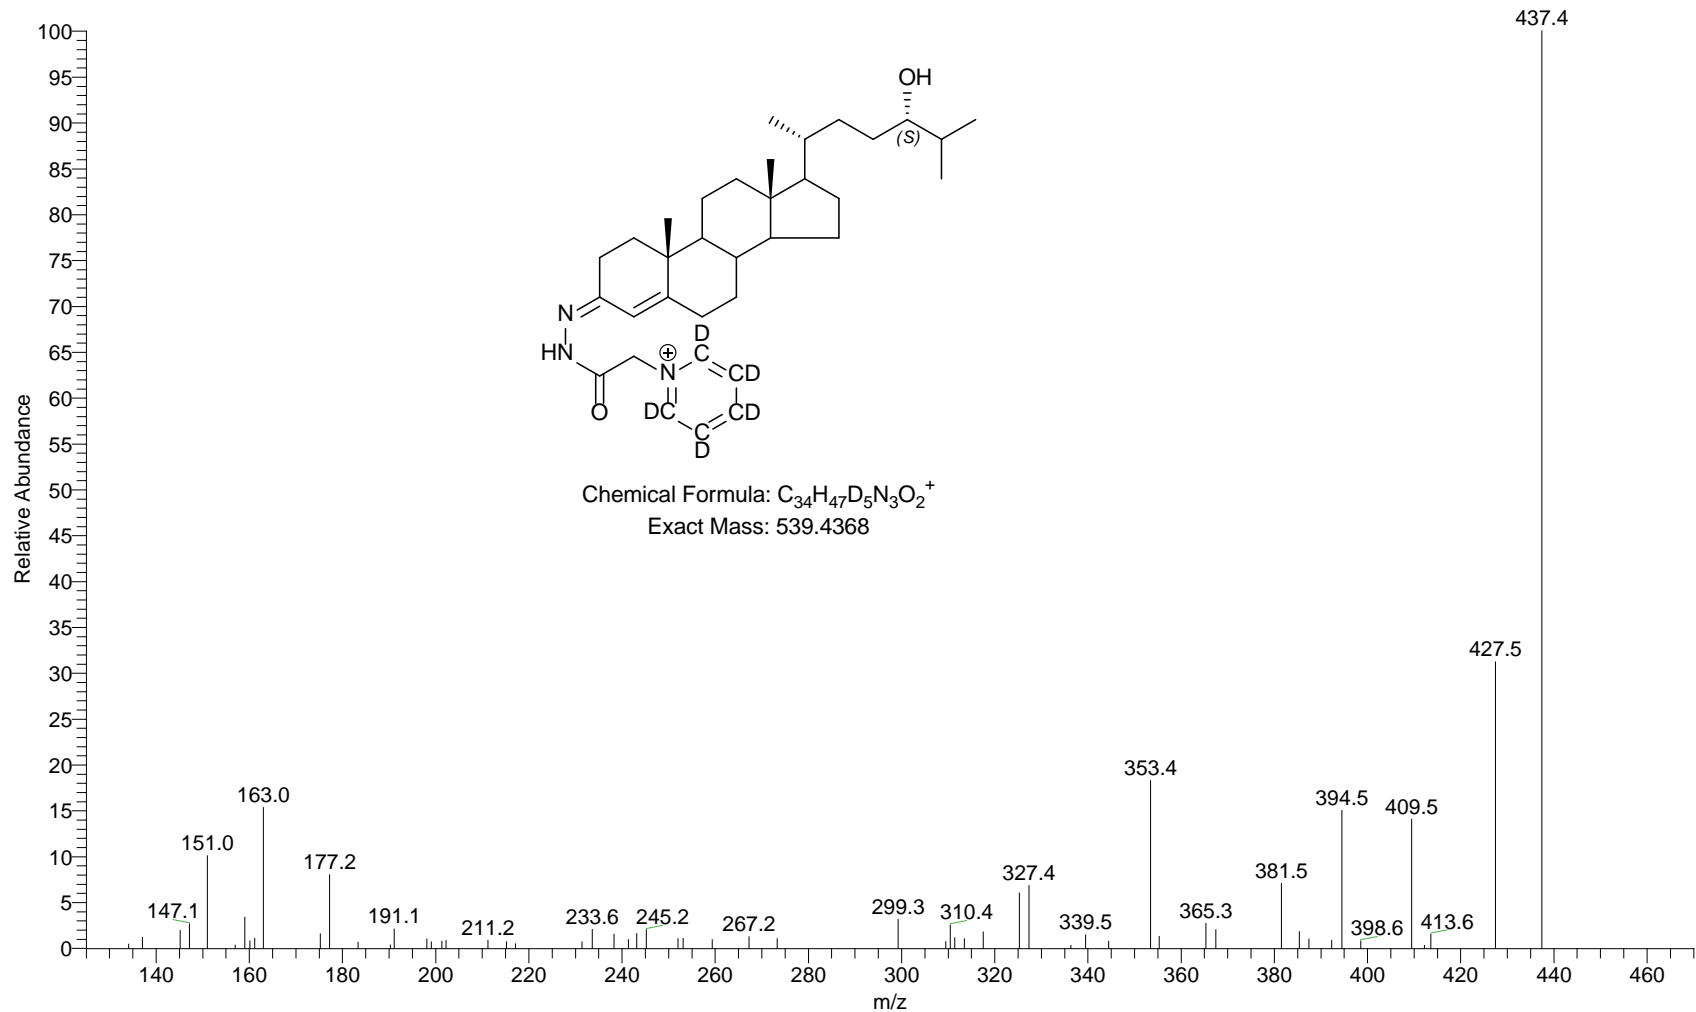

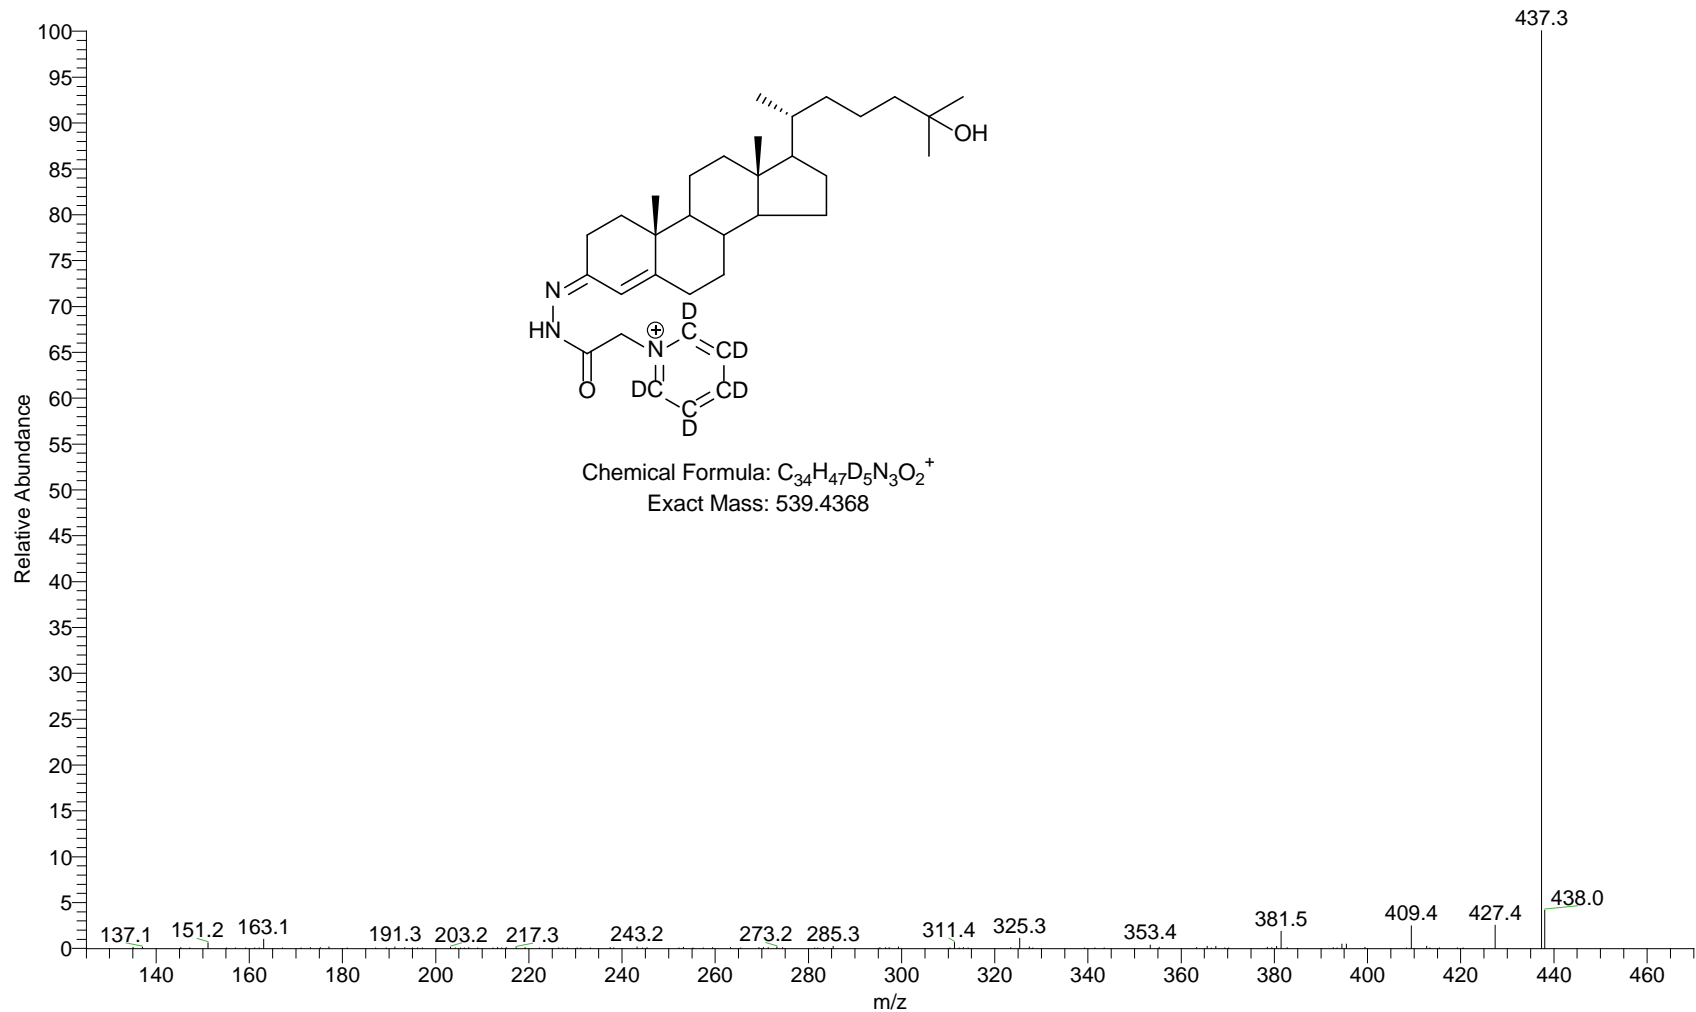

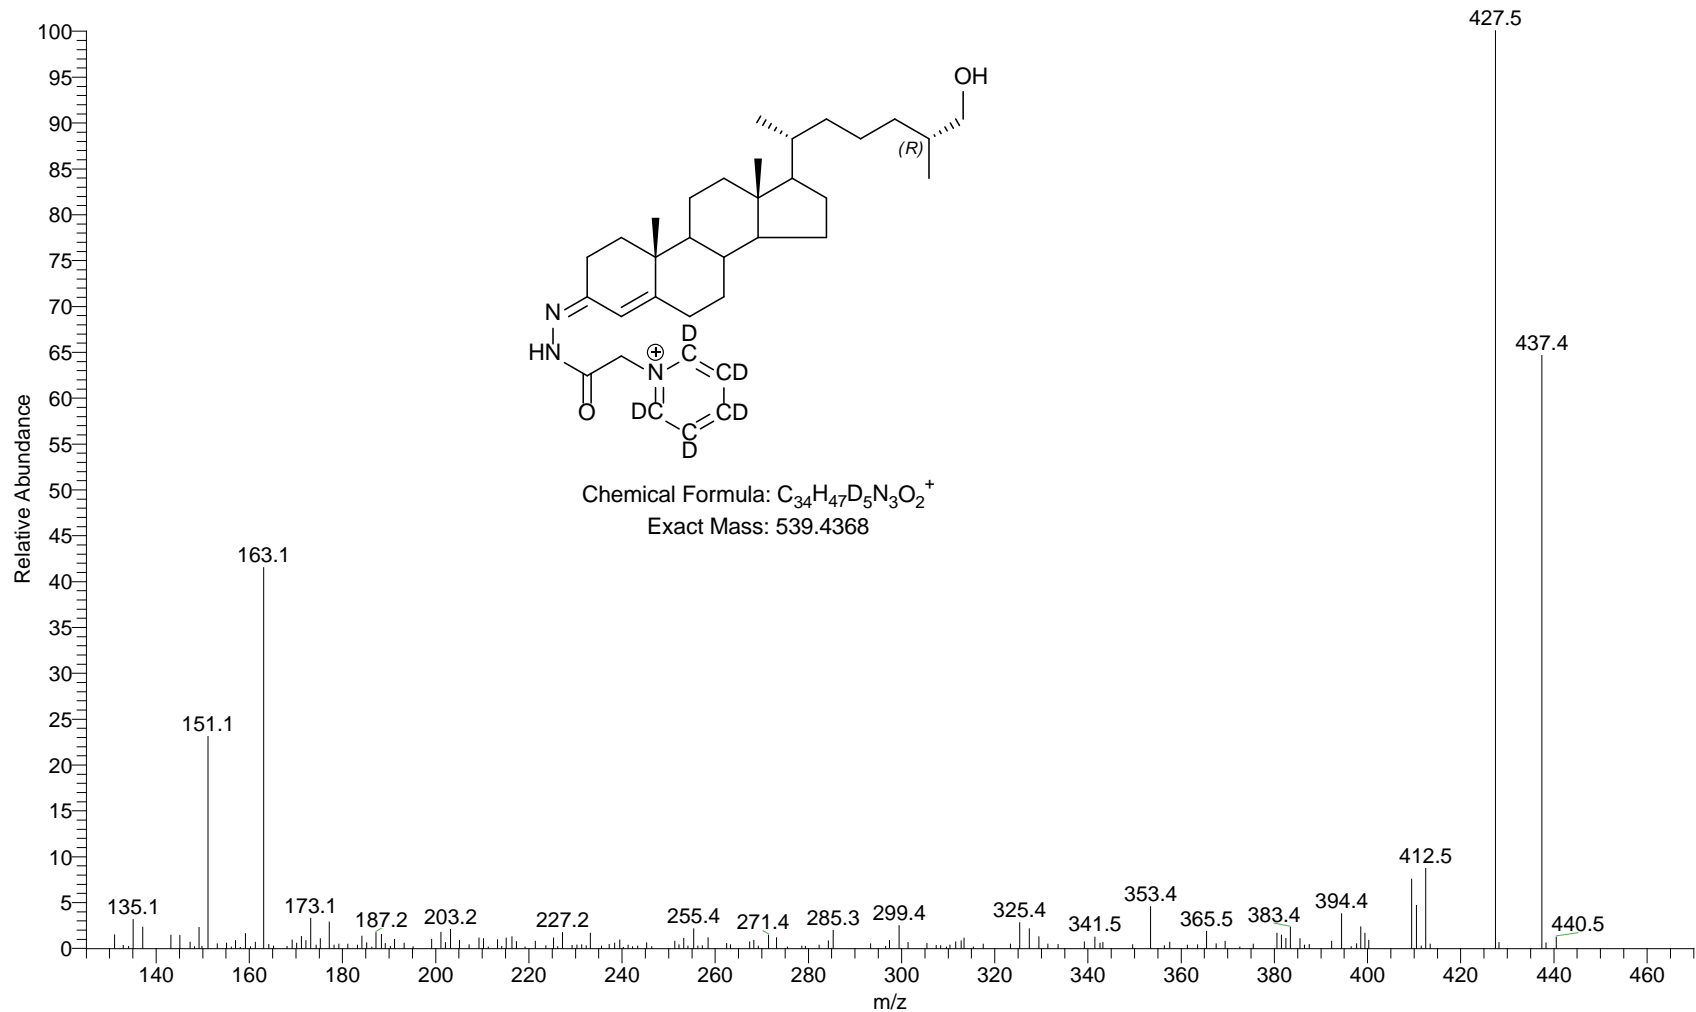

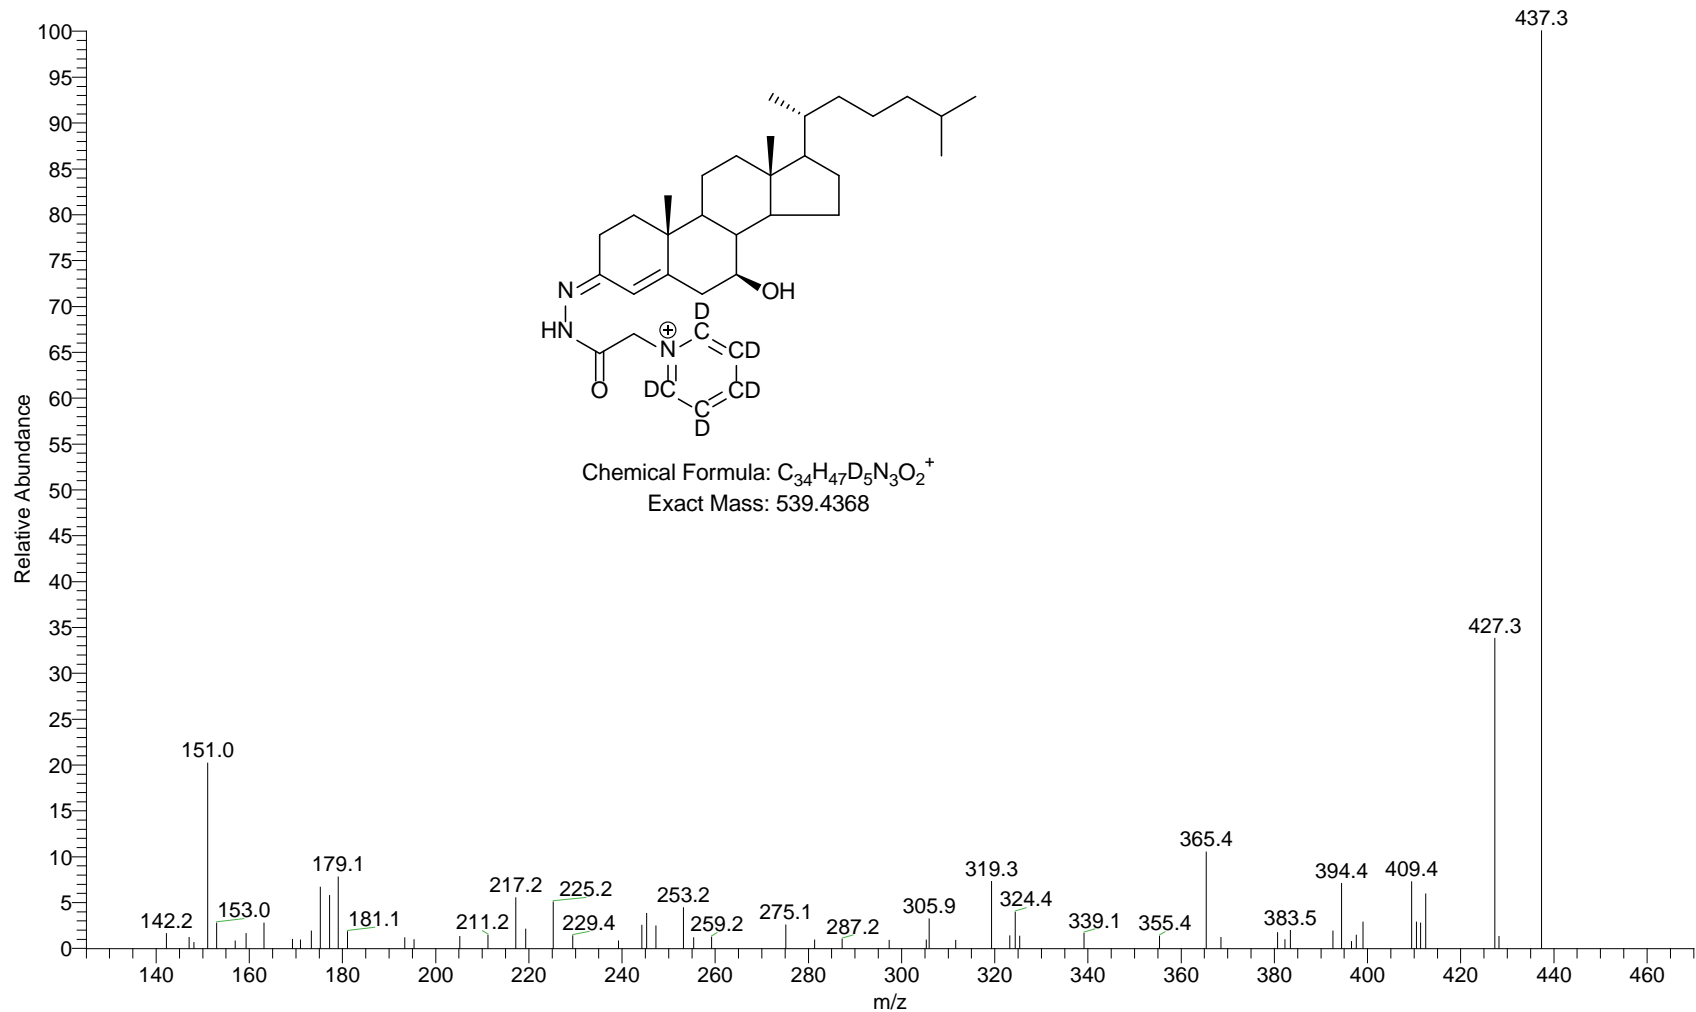

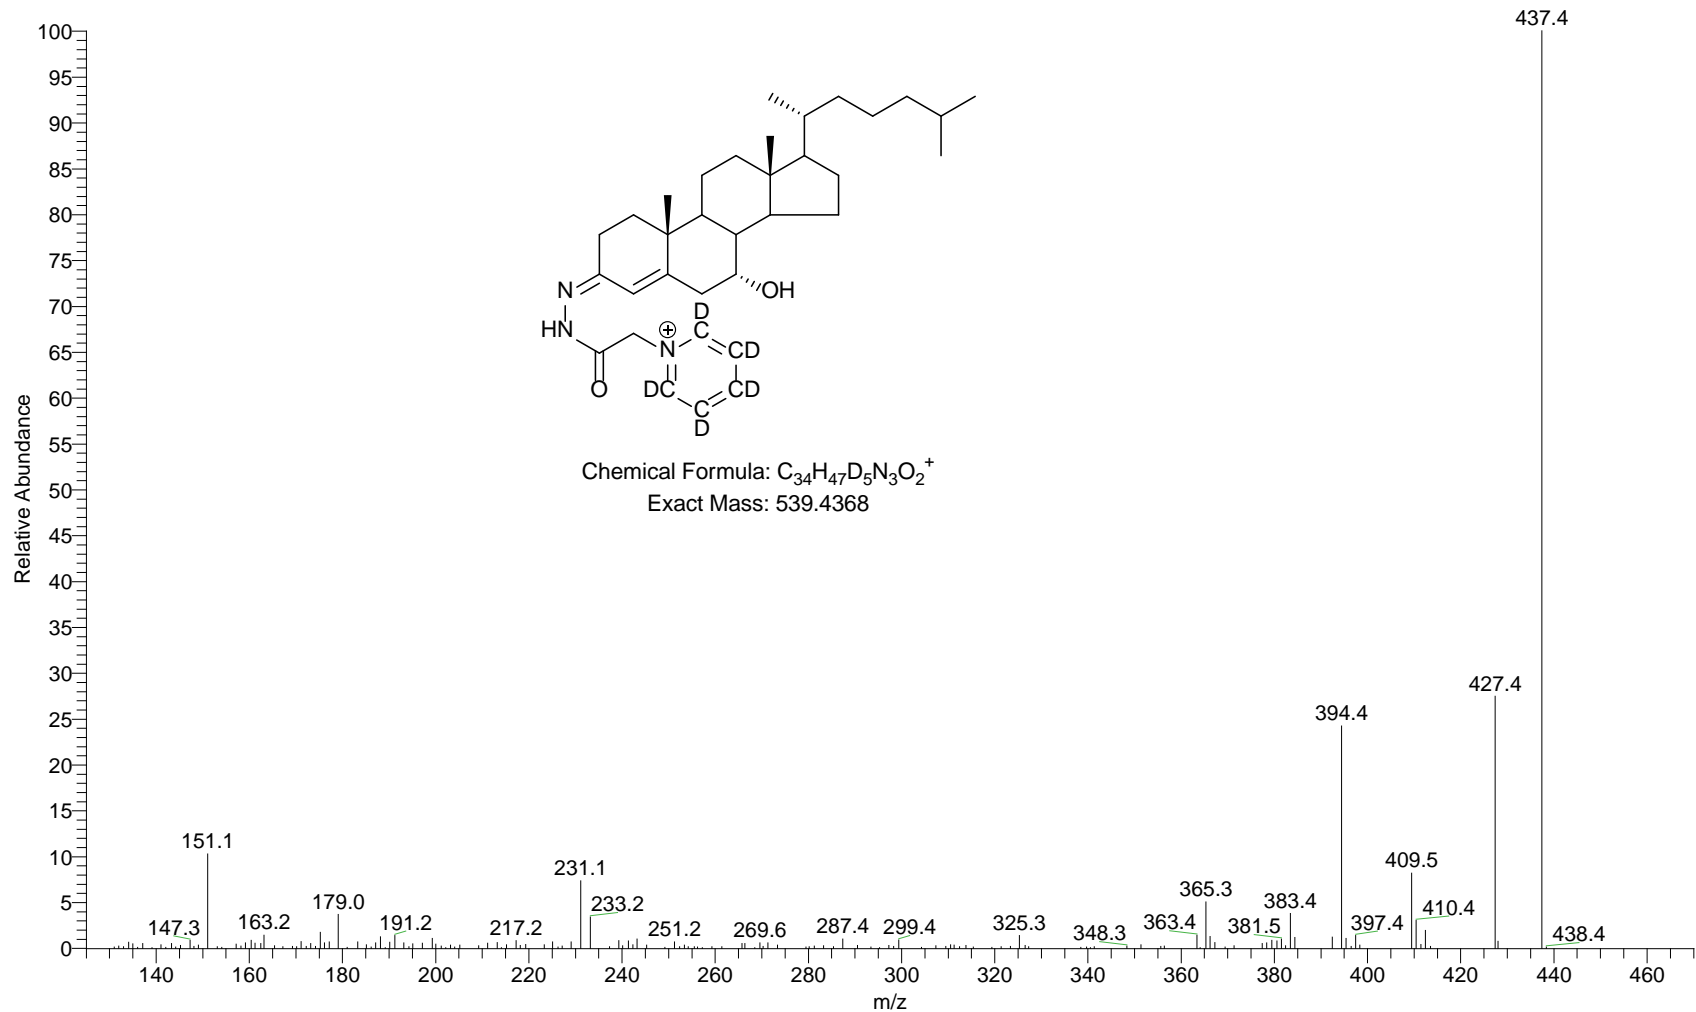

RT: 0.00 - 17.01

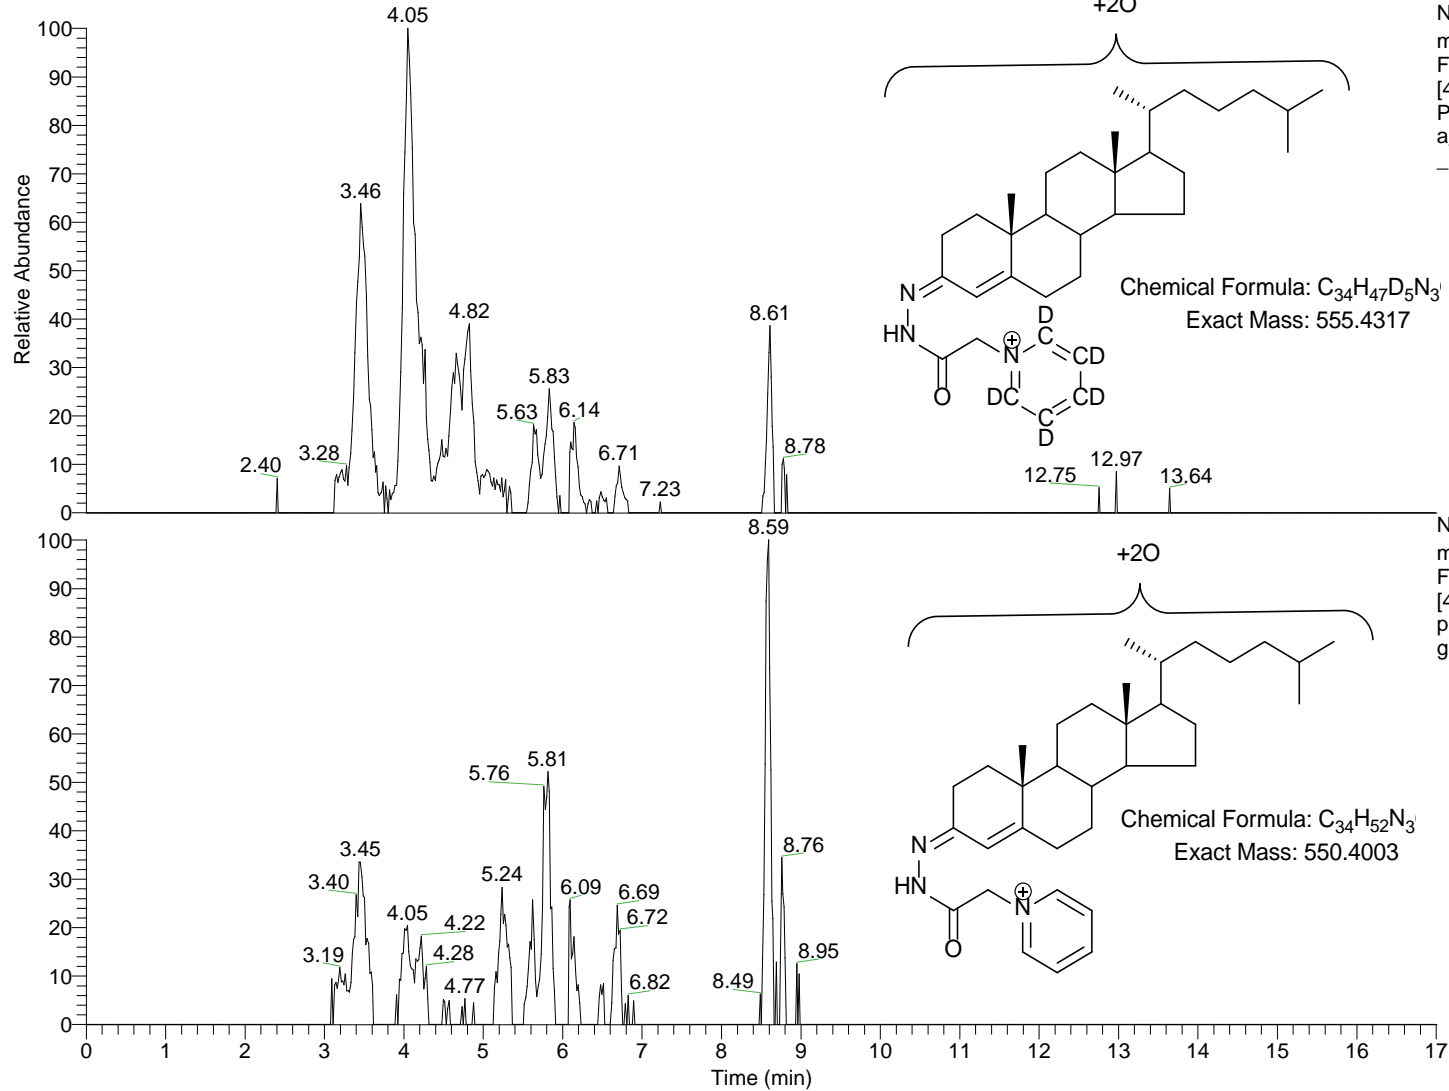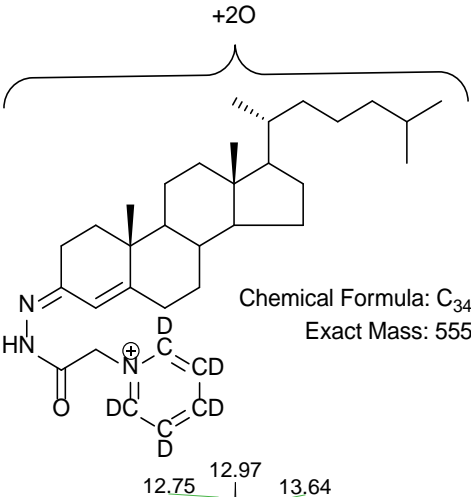

NL: 3.02E3  
m/z= 555.4289-555.4345 F:  
FTMS + p ESI Full ms  
[400.00-610.00] MS  
PC\_m\_plasma\_KO\_1167\_Fr1  
a\_GPd5\_Fr1b\_GPd0\_120809\_06

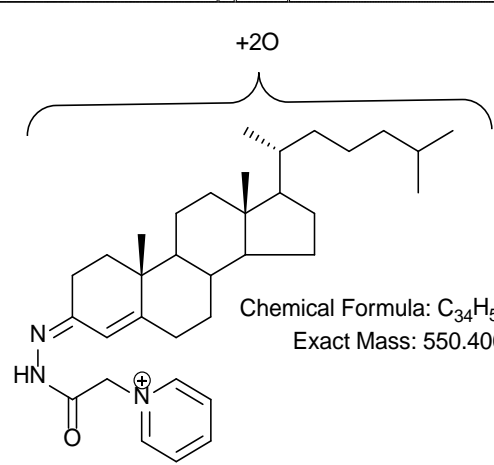

NL: 1.61E3  
m/z= 550.3975-550.4031 F:  
FTMS + p ESI Full ms  
[400.00-610.00] MS  
pc\_m\_plasma\_wt\_1178\_fr1a\_gpd0\_fr1b\_gpd5\_120809\_06



RT: 0.00 - 17.01

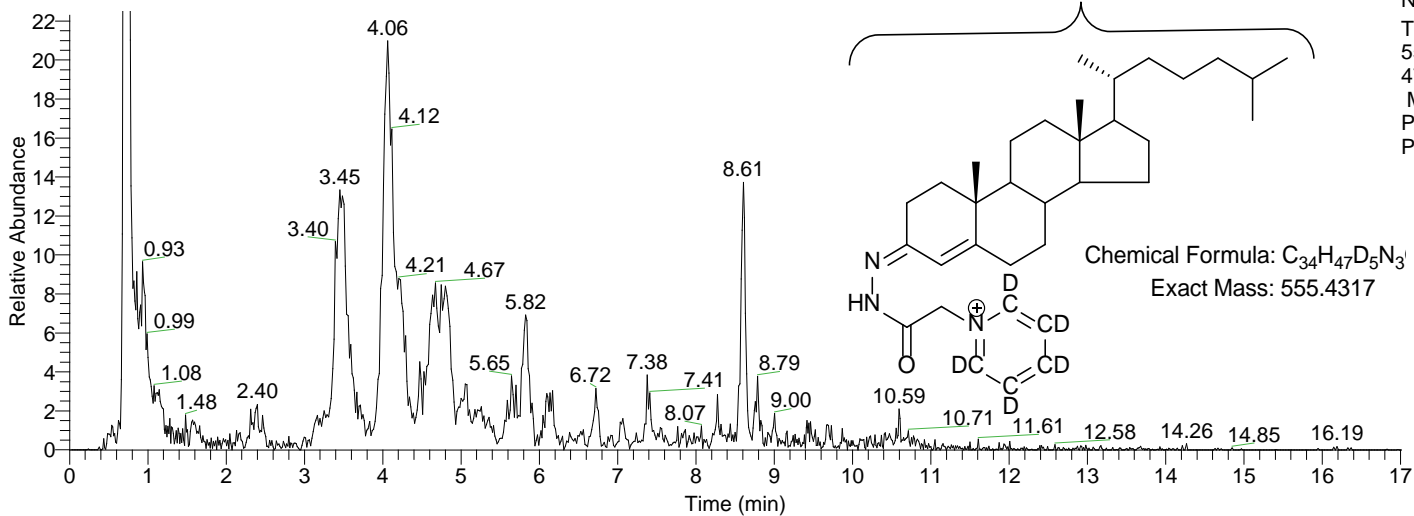

NL: 7.66E3  
TIC F: ITMS + c ESI Full ms3  
555.43@cid30.00  
471.36@cid35.00 [125.00-560.00]  
MS  
PC\_m\_plasma\_KO\_1167\_Fr1a\_G  
Pd5\_Fr1b\_GPd0\_120809\_06

RT: 0.00 - 17.00

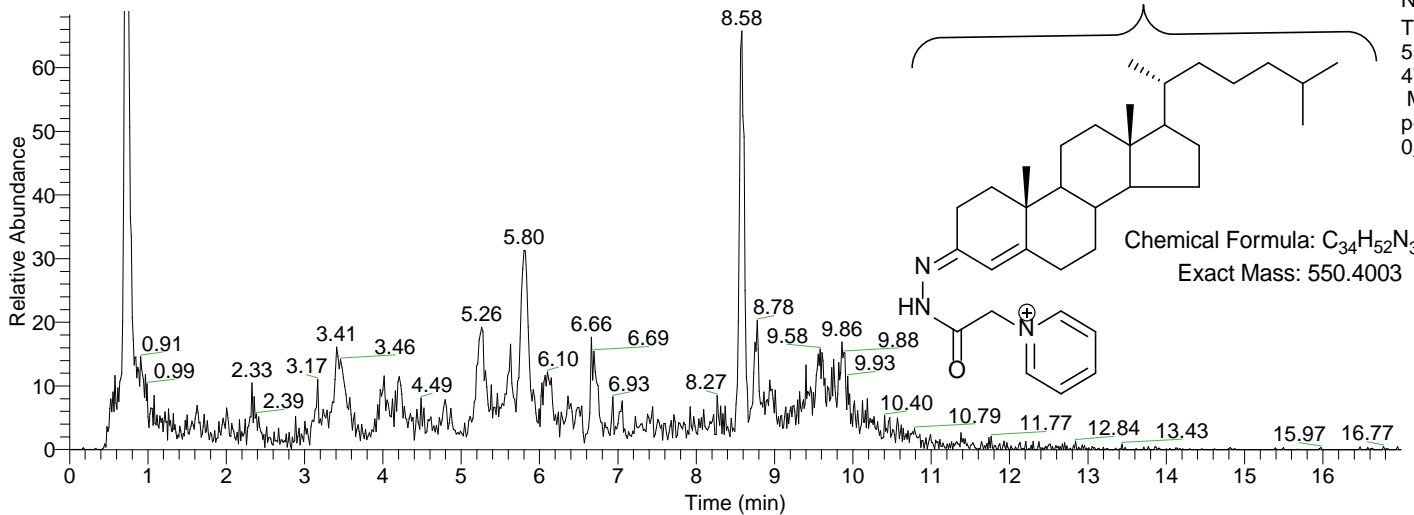

NL: 2.19E3  
TIC F: ITMS + c ESI Full ms3  
550.40@cid30.00  
471.36@cid35.00 [125.00-560.00]  
MS  
pc\_m\_plasma\_wt\_1178\_fr1a\_gpd  
0\_fr1b\_gpd5\_120809\_06

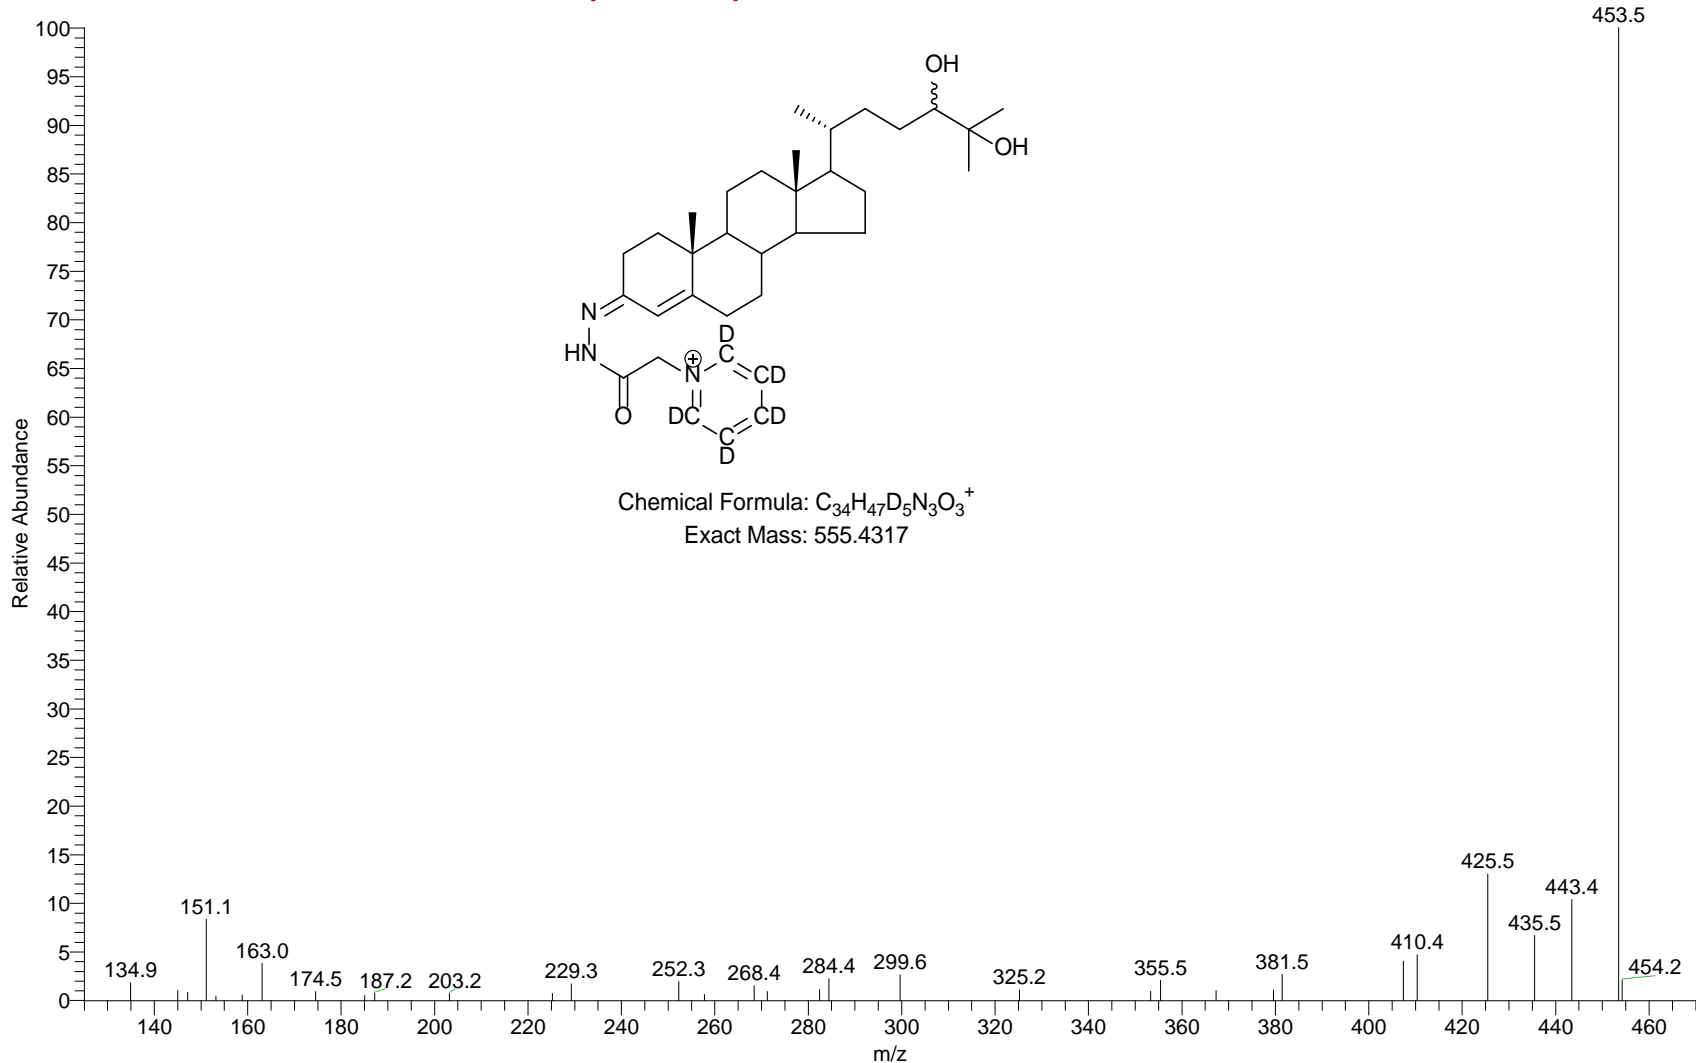

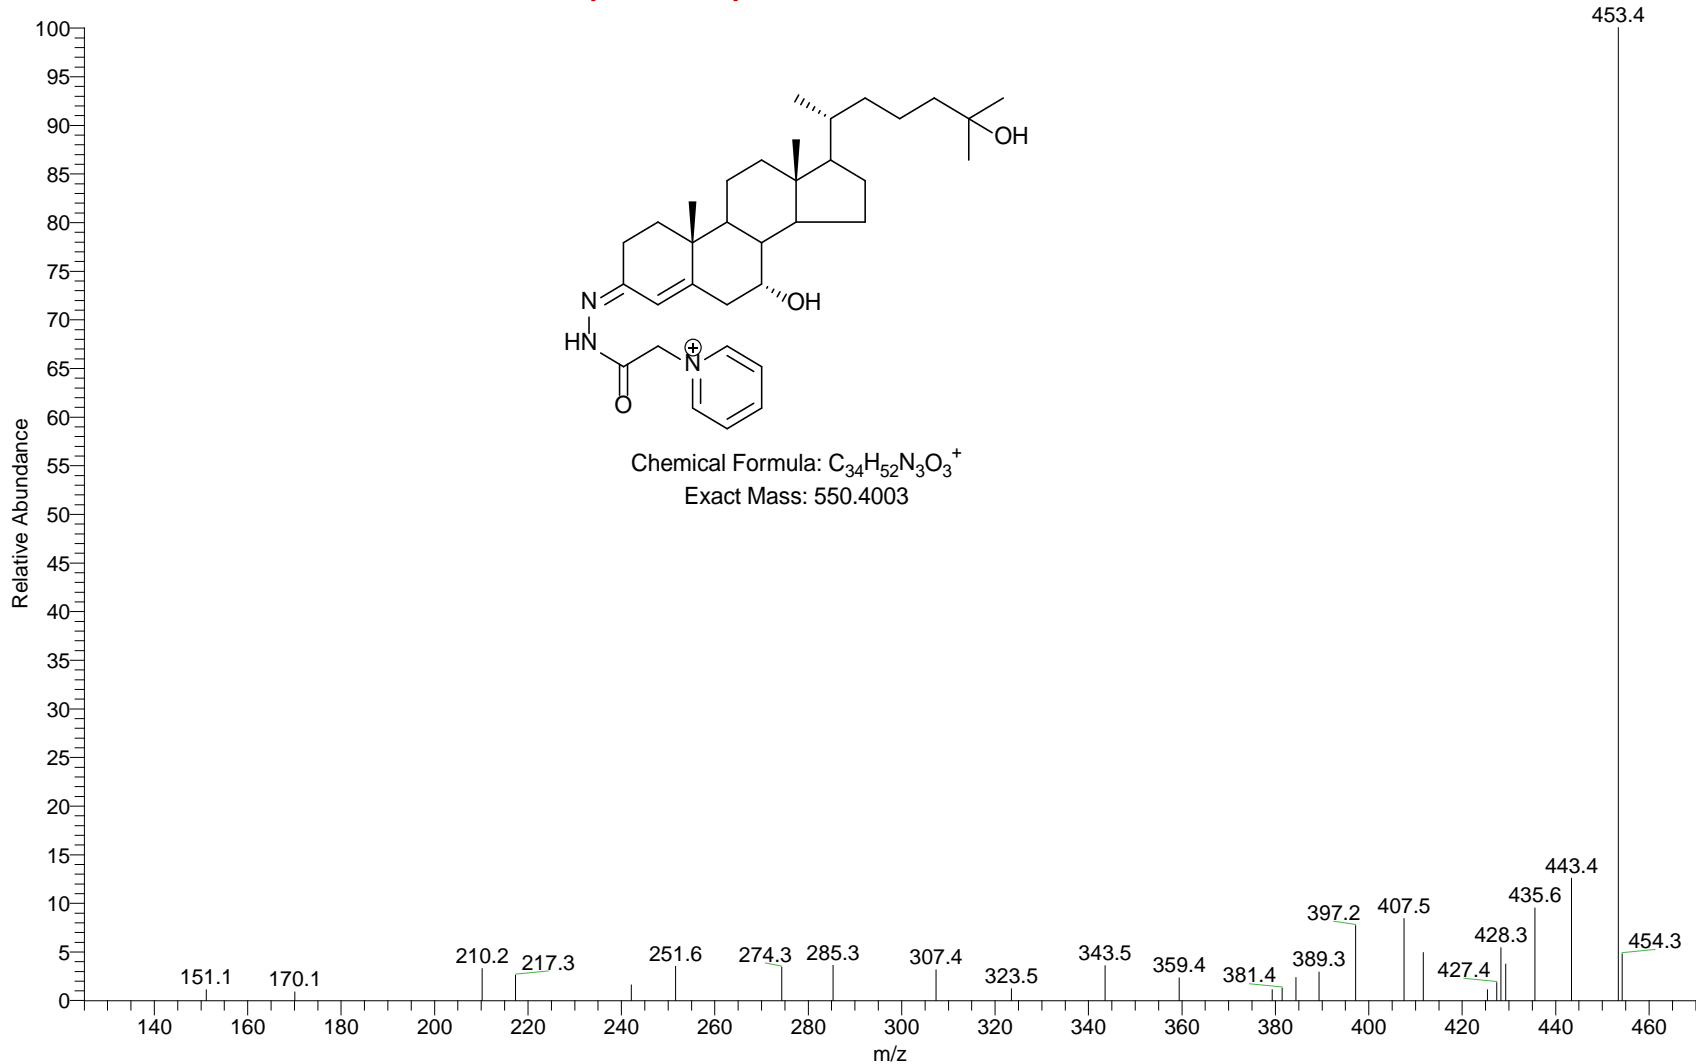

pc\_m\_plasma\_wt\_1178\_fr1a\_gpd0\_fr1b\_gpd5\_120809\_06 #1152-1165 RT: 5.77-5.82 AV: 4 NL: 7.36E1  
F: ITMS + c ESI Full ms3 550.40@cid30.00 471.36@cid35.00 [125.00-560.00]

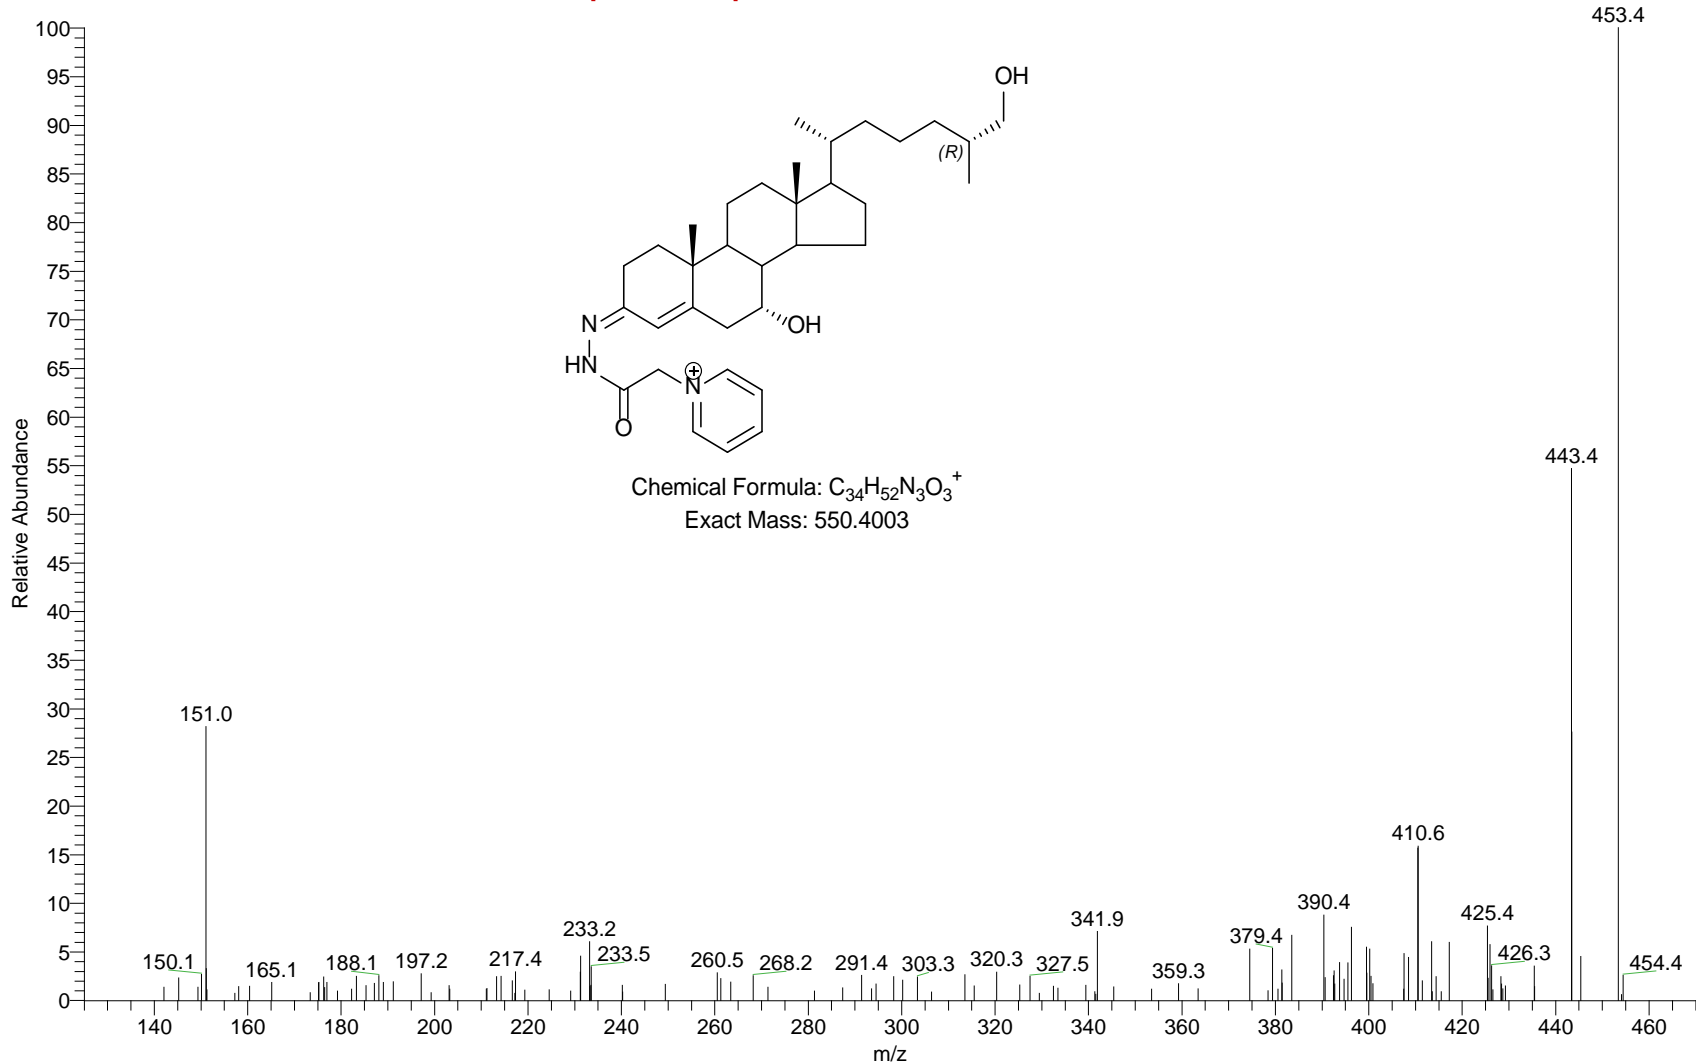

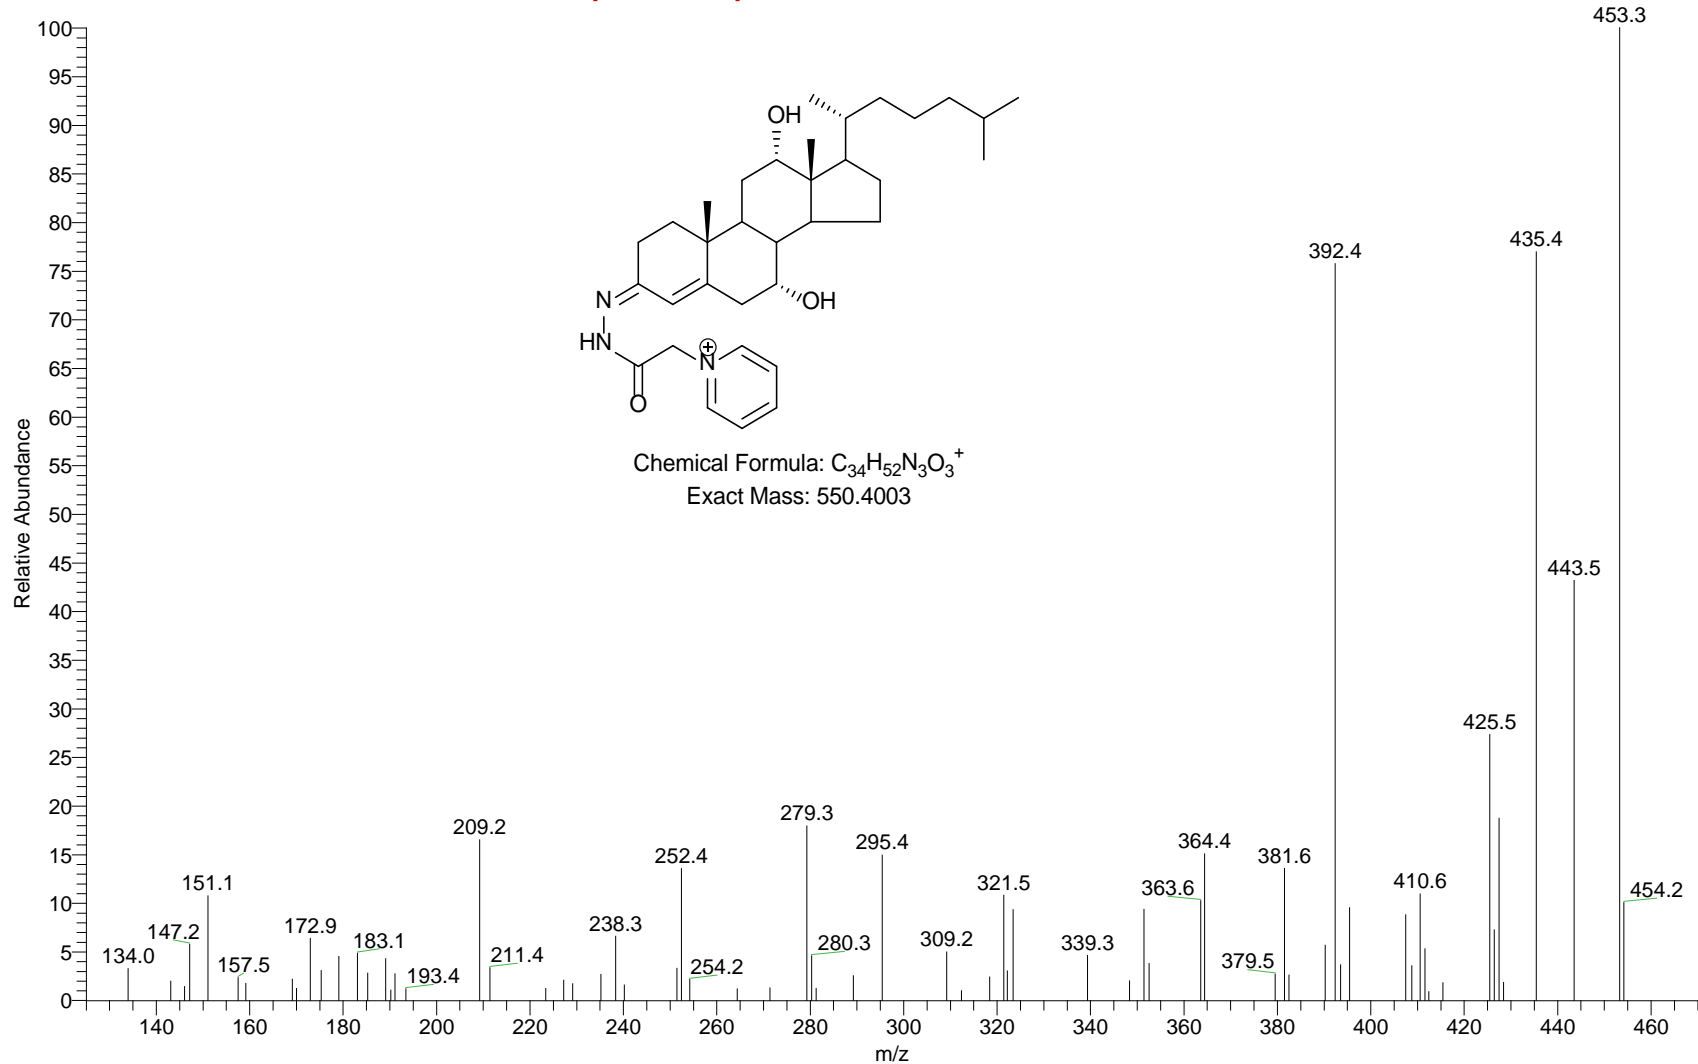

RT: 0.00 - 17.01

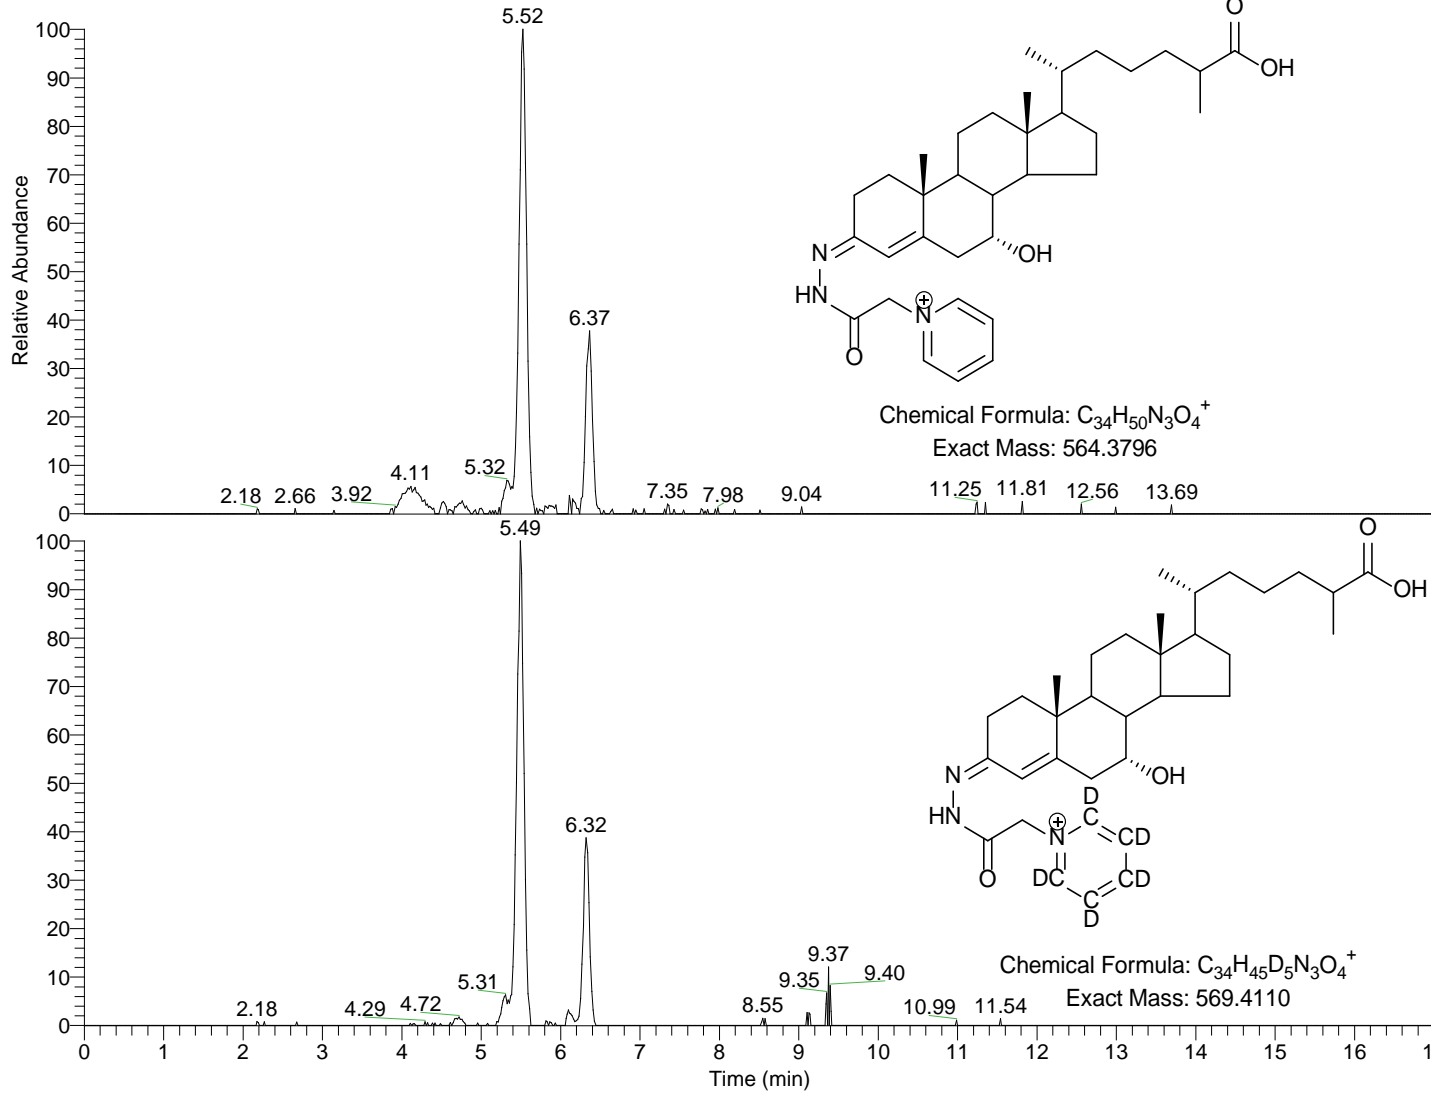

NL: 1.11E4  
m/z= 564.3768-564.3824 F:  
FTMS + p ESI Full ms  
[400.00-610.00] MS  
PC\_m\_plasma\_KO\_1167\_Fr1  
a\_GPd5\_Fr1b\_GPd0\_120809  
\_07

NL: 1.61E4  
m/z= 569.4082-569.4138 F:  
FTMS + p ESI Full ms  
[400.00-610.00] MS  
pc\_m\_plasma\_wt\_1178\_fr1a  
gpd0\_fr1b\_gpd5\_120809\_07

RT: 0.00 - 17.01

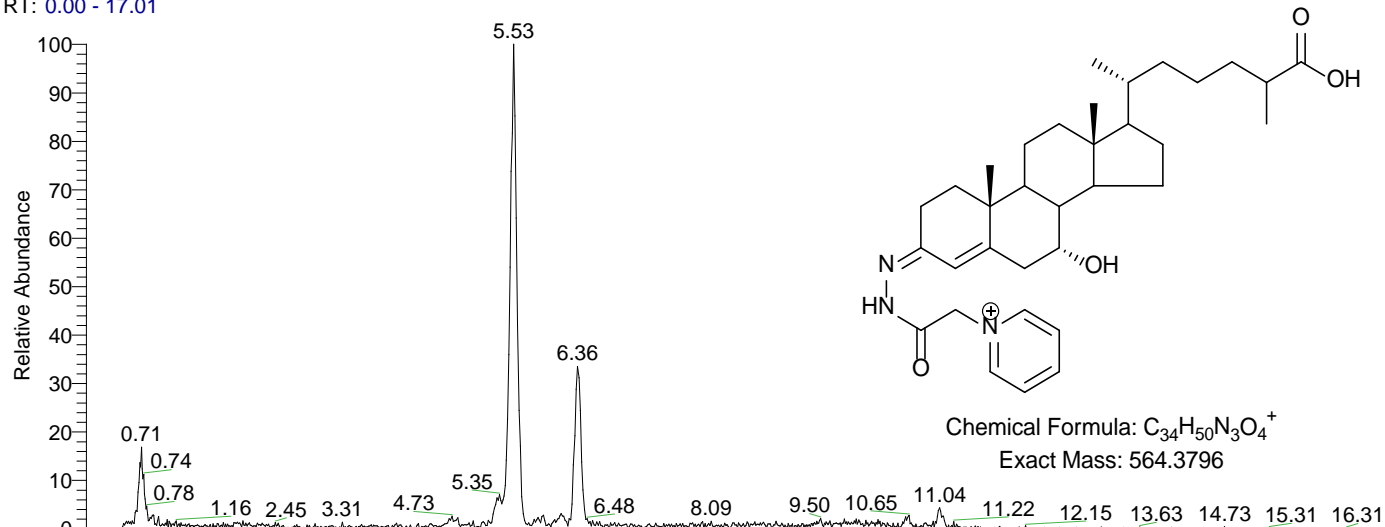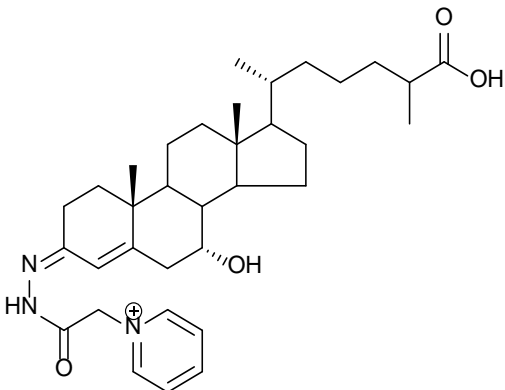

Chemical Formula:  $C_{34}H_{50}N_3O_4^+$   
Exact Mass: 564.3796

NL: 6.76E3  
TIC F: ITMS + c ESI Full ms3  
564.38@cid30.00  
485.34@cid35.00 [130.00-575.00]  
MS  
PC\_m\_plasma\_KO\_1167\_Fr1a\_G  
Pd5\_Fr1b\_GPd0\_120809\_07

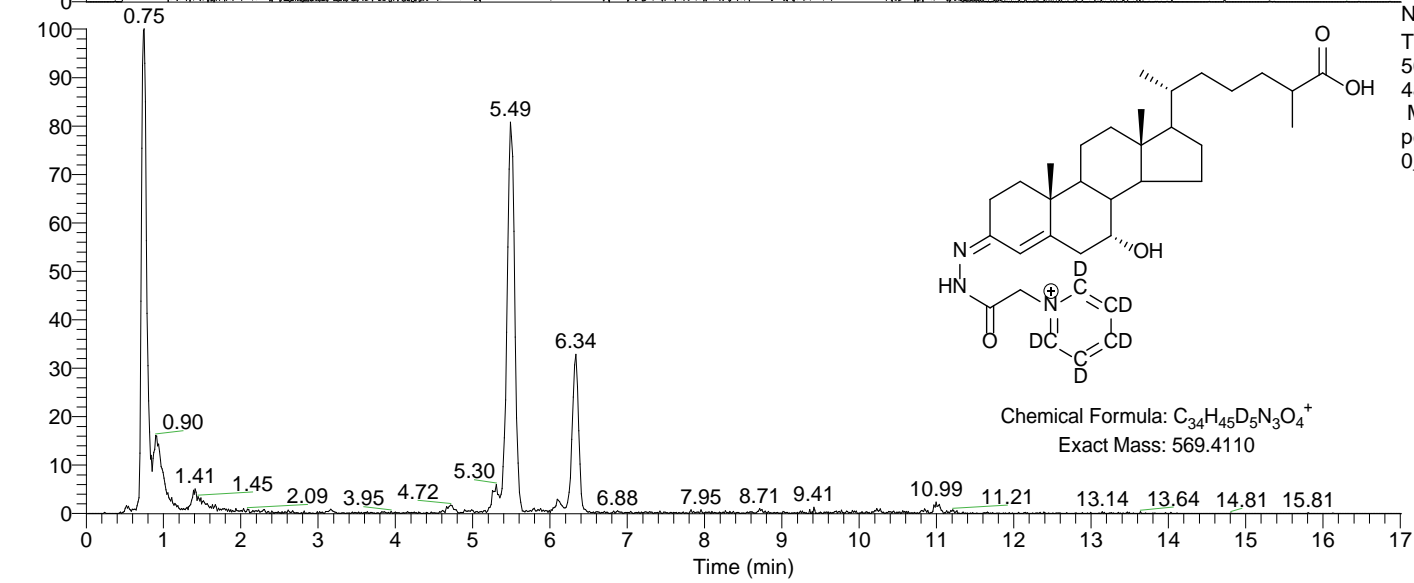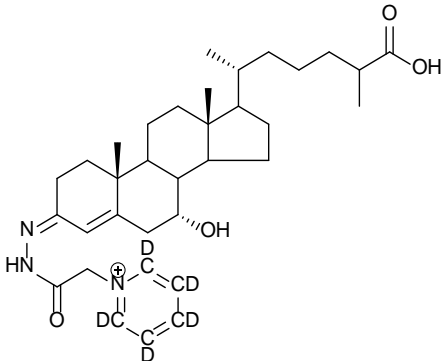

Chemical Formula:  $C_{34}H_{45}D_5N_3O_4^+$   
Exact Mass: 569.4110

NL: 1.08E4  
TIC F: ITMS + c ESI Full ms3  
569.41@cid30.00  
485.34@cid35.00 [130.00-575.00]  
MS  
pc\_m\_plasma\_wt\_1178\_fr1a\_gpd  
0\_fr1b\_gpd5\_120809\_07

pc\_m\_plasma\_wt\_1178\_fr1a\_gpd0\_fr1b\_gpd5\_120809\_07 #1110 RT: 5.49 AV: 1 NL: 2.69E3  
F: ITMS + c ESI Full ms3 569.41 @cid30.00 485.34 @cid35.00 [130.00-575.00]

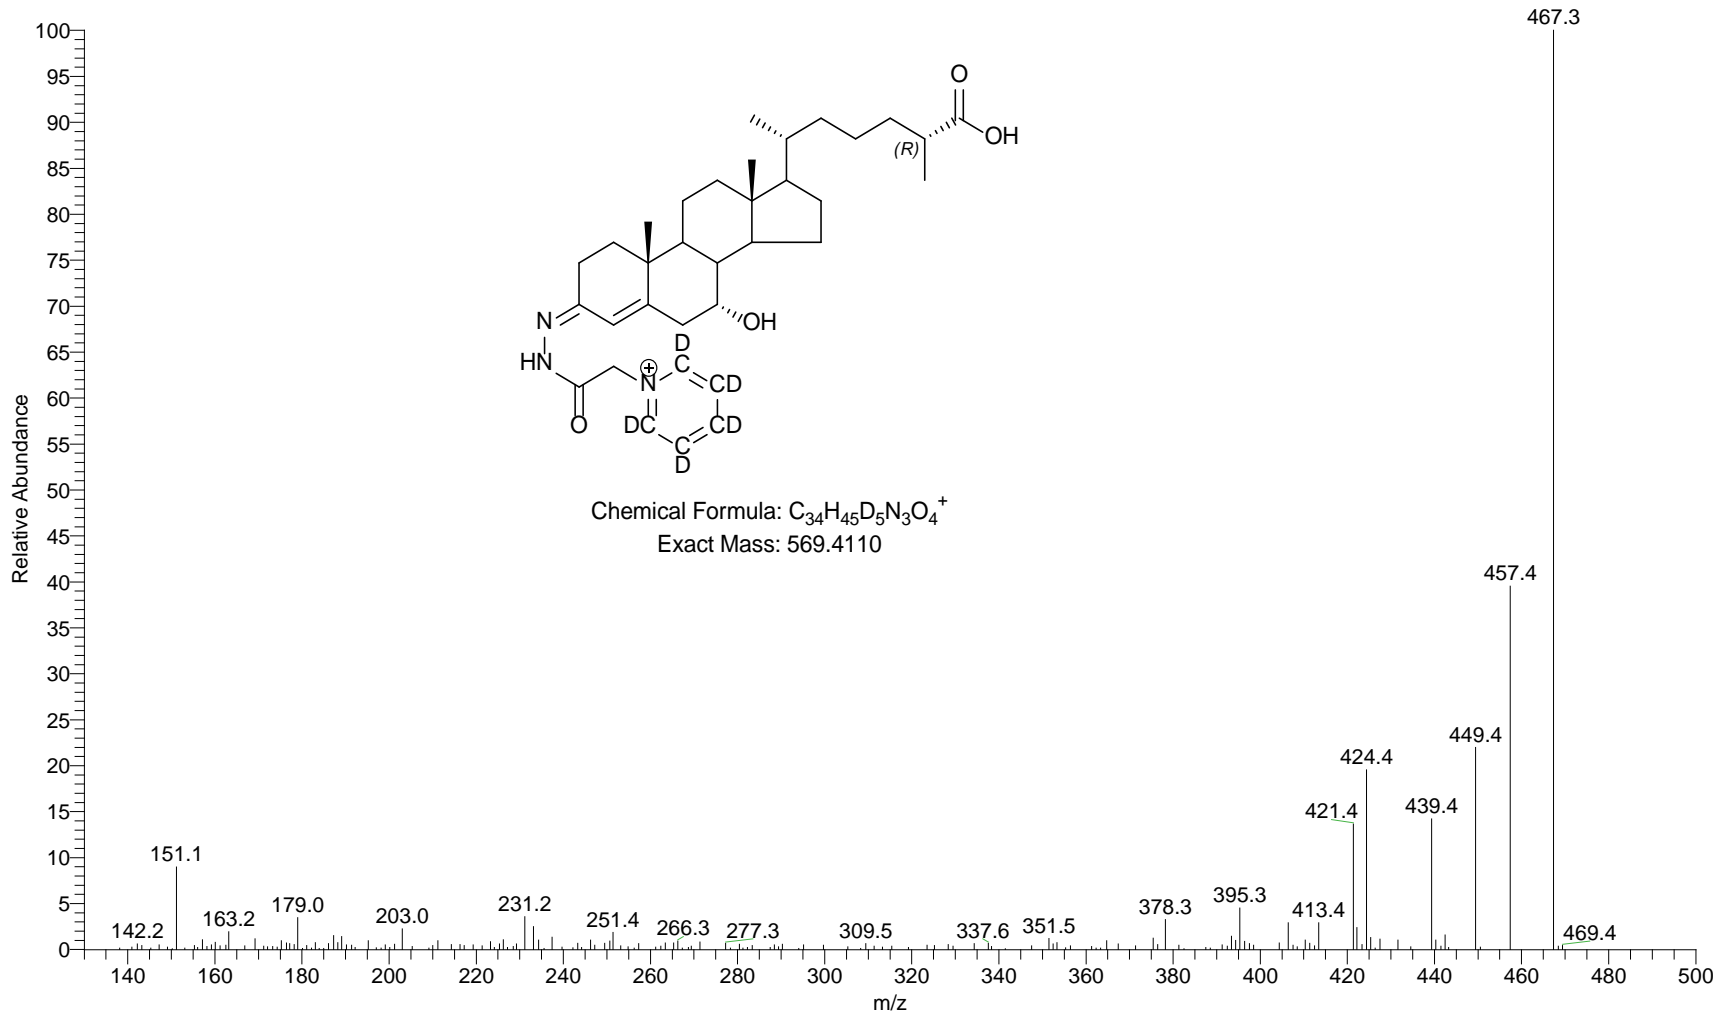



RT: 0.00 - 17.01

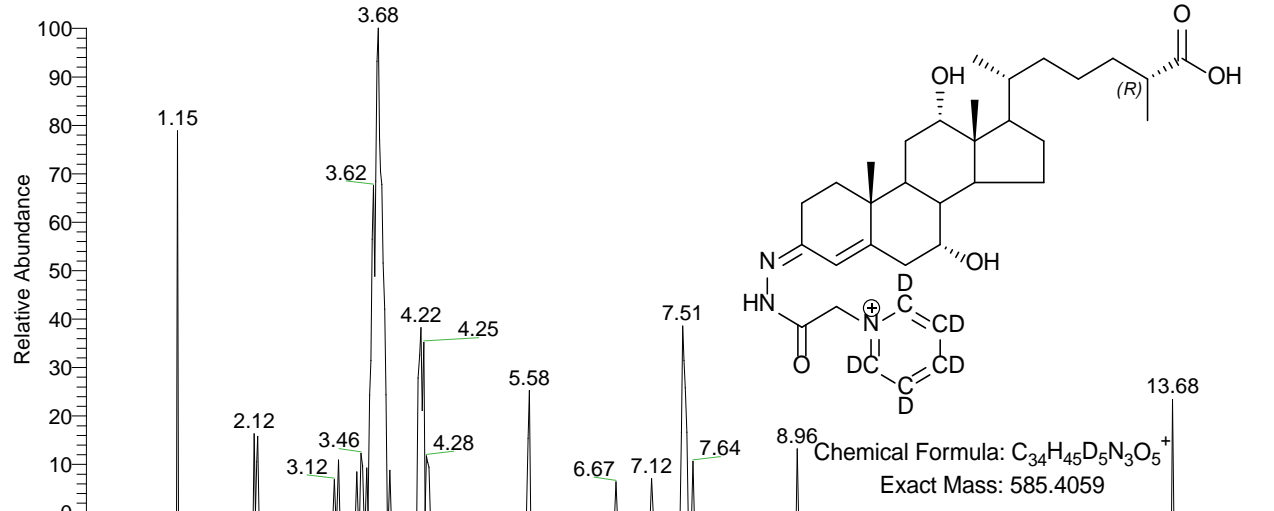

NL: 8.94E2  
m/z= 585.4030-585.4088 F:  
FTMS + p ESI Full ms  
[400.00-610.00] MS  
PC\_m\_plasma\_KO\_1167\_Fr1  
a\_GPd5\_Fr1b\_GPd0\_120809  
\_03

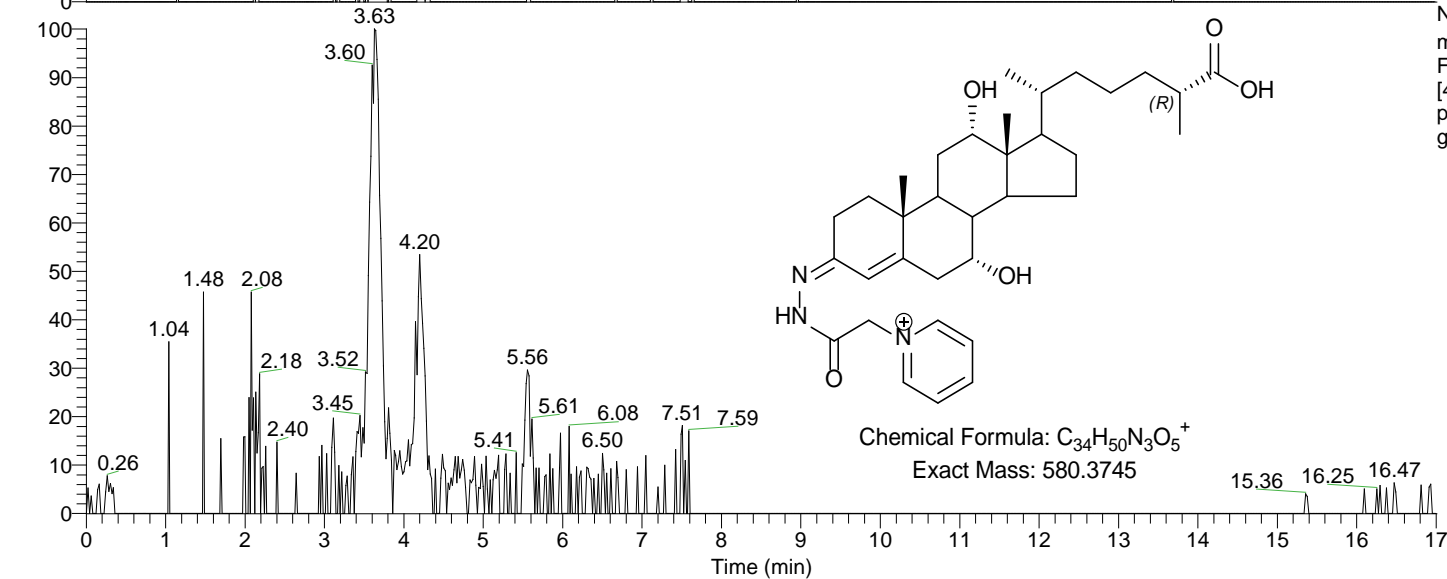

NL: 1.07E3  
m/z= 580.3716-580.3774 F:  
FTMS + p ESI Full ms  
[400.00-610.00] MS  
pc\_m\_plasma\_wt\_1178\_fr1a\_gpd0\_fr1b\_gpd5\_120809\_03

RT: 0.00 - 17.01

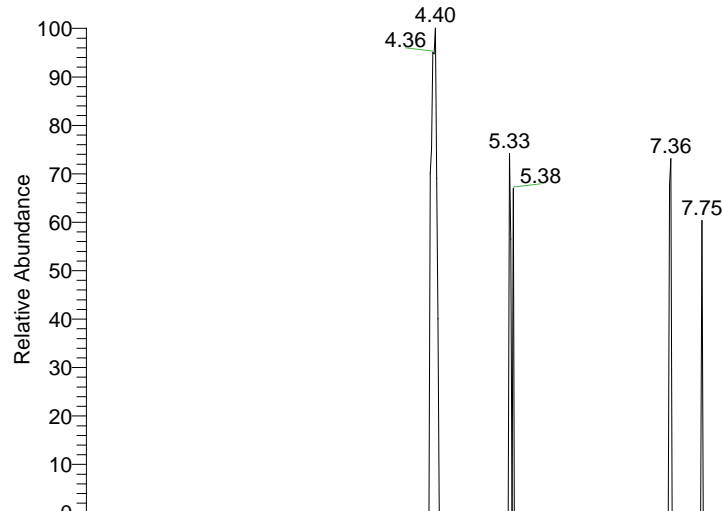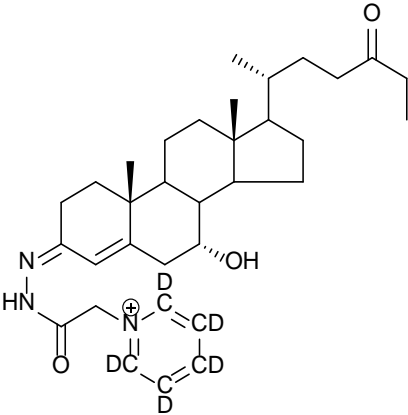

NL: 1.67E2  
m/z= 539.3977-539.4031 F:  
FTMS + p ESI Full ms  
[400.00-610.00] MS  
PC\_m\_plasma\_KO\_1167\_Fr1  
a\_GPd5\_Fr1b\_GPd0\_120809  
\_03

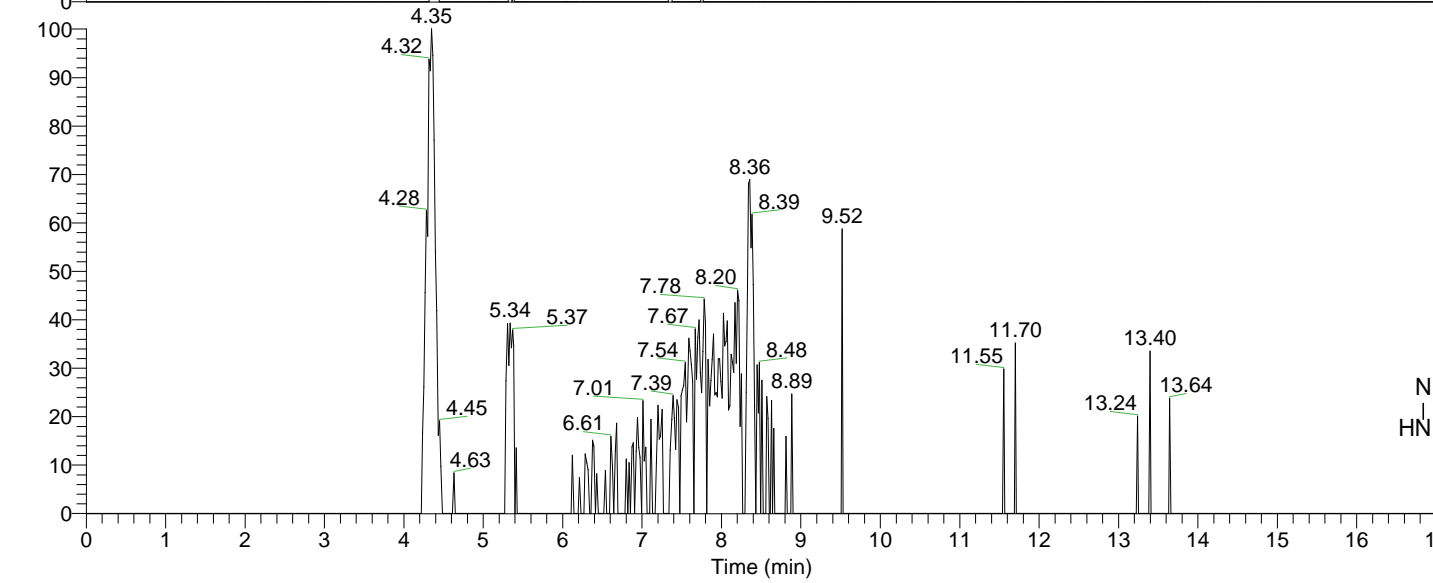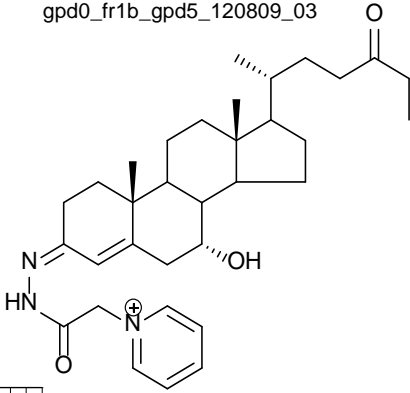

NL: 6.99E2  
m/z= 534.3663-534.3717 F:  
FTMS + p ESI Full ms  
[400.00-610.00] MS  
pc\_m\_plasma\_wt\_1178\_fr1a\_gpd0\_fr1b\_gpd5\_120809\_03

pc\_m\_plasma\_wt\_1178\_fr1a\_gpd0\_fr1b\_gpd5\_120809\_03 #884 RT: 4.31 AV: 1 NL: 1.48E2  
F: ITMS + c ESI Full ms3 534.41 @cid30.00 455.36 @cid35.00 [125.00-545.00]

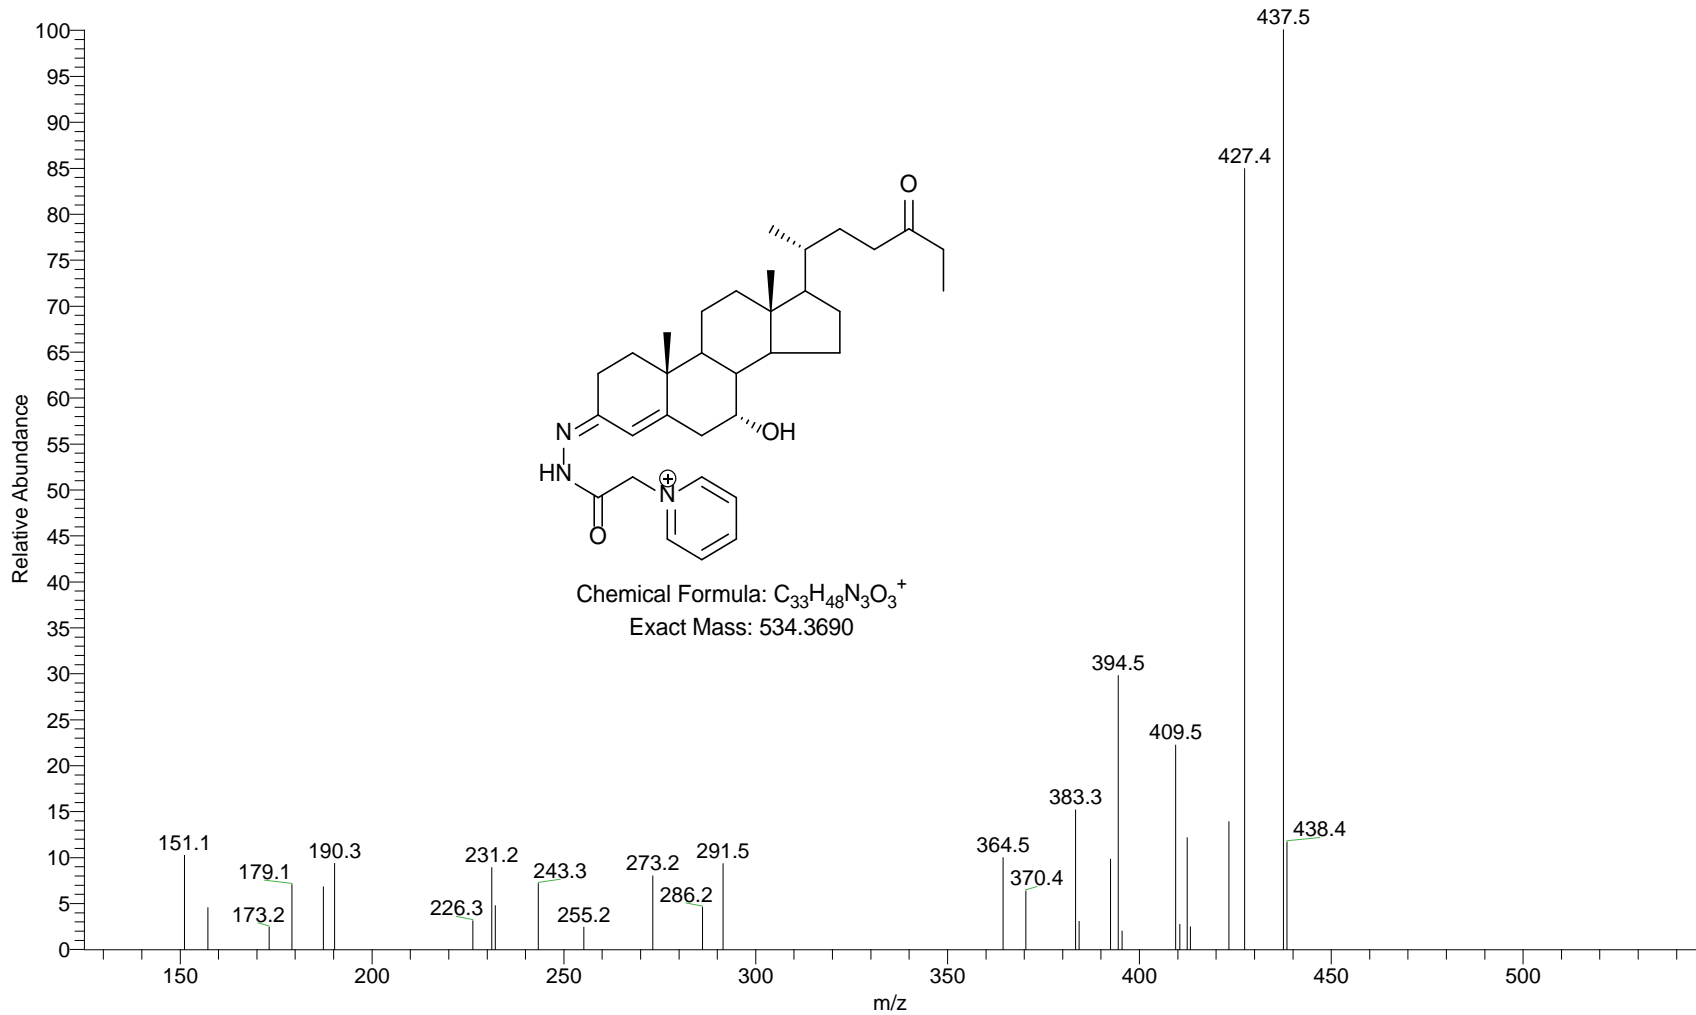

Supplement: s1 [file s1]
